# Supplementary material for: Identification and validation of novel microtubule suppressors with an imidazopyridine scaffold through structure-based virtual screening and docking
Source: Royal Society of Chemistry journal article supplement (doi:10.1039/d1md00392e), 2022-01-01
Supplement: d1md00392e1.pdf [file d1md00392e1.pdf]

## ELECTRONIC SUPPORTING INFORMATION

### Identification and Validation of Novel Microtubule Suppressors with an Imidazopyridine Scaffold through Structure-Based Virtual Screening and Docking.

Samia A. Elseginy,<sup>1,2</sup> A. Sofia F. Oliveira,<sup>1,3</sup> Deborah K. Shoemark<sup>1</sup>, Richard B. Sessions<sup>1\*</sup>

<sup>1</sup>School of Biochemistry, University of Bristol, Biomedical Sciences Building, University Walk, Bristol, BS8 1TD, U.K.

<sup>2</sup>Green Chemistry Department, Chemical Industries Research Division, National Research Centre, 12622, Egypt.

<sup>3</sup>School of Chemistry, University of Bristol, Bristol.BS8 1TS, UK

#### Table of Contents

Table S1: Chemical structures and docking energies of shortlisted compounds.

Table S2: Physical properties of shortlisted compounds.

Table S3: effect of compound 6 on phases of the MCF7 cell cycle.

Table S4: Molecular docking results for compounds **6**, **8** and **9**.

Table S5: RMSD averages of the molecular dynamics simulations.

Figure S1: Schematic view of pharmacophore structure-based virtual screening.

Figure S2: Similarity clustering of the best 61 compounds (99 from virtual screening filtered for toxicology risk) and 50 ligands from complexes of known structure.

Figure S3: Chemical and geometric properties of the best 99 compounds from virtual screening and 50 ligands from complexes of known structure.

Figure S4: RMSD plots of the molecular dynamics simulations.

Figure S5: Ligplot<sup>+</sup> protein-ligand contact diagrams.

Figures S6-S11: Compound characterisation data, <sup>1</sup>H, <sup>13</sup>C NMR, GCMS.

**Table S1:** Chemical structure of shortlisted compounds and their binding energies by BUDE, AutoDock, and MOE.

| Cp. | ZINC-ID      | Structure                                                                           | BUDE binding energy kj/mol | AutoDock binding energy Kcal/mol | MOE Binding Energy kcal/mol |
|-----|--------------|-------------------------------------------------------------------------------------|----------------------------|----------------------------------|-----------------------------|
| 1   | Zinc02843810 | 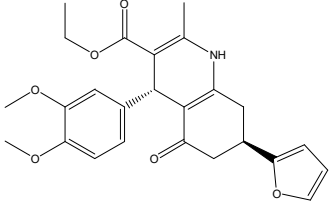   | -111.013                   | -9.79                            | -6.28                       |
| 2   | Zinc02691641 |    | -92.82                     | -10.31                           | -7.2                        |
| 3   | Zinc03614688 |   | -91.78                     | -7.87                            | -5.2                        |
| 4   | Zinc49543397 |  | -104.3                     | -9.14                            | -8.01                       |
| 5   | Zinc02690781 |  | -100.75                    | -10.08                           | -8.24                       |
| 6   | Zinc36360243 |  | -100.9                     | -8.57                            | -10.88                      |

|    |              |                                                                                      |         |        |       |
|----|--------------|--------------------------------------------------------------------------------------|---------|--------|-------|
| 7  | Zinc18200970 | 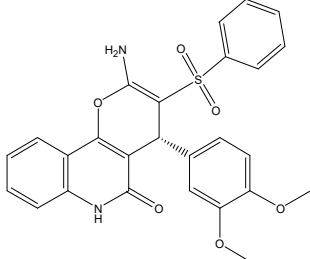    | -125.35 | -9.7   | -6.9  |
| 8  | Zinc02690805 |     | -119.48 | -9.65  | -9.61 |
| 9  | Zinc02690789 |     | -108.21 | -10.02 | -8.93 |
| 10 | Zinc07095120 |    | -83.65  | -9.79  | -5.5  |
| 11 | Zinc11112053 |   | -83.66  | -9.9   | -6.32 |
| 12 | Zinc23483881 |   | -84.55  | -9.9   | -5.7  |
| 13 | Zinc09373064 |  | 105.95  | -10.91 | -6.36 |

**Table S2:** Physical properties of shortlisted compounds calculated by MOE.

| Compounds | ZINC ID      | MwSt   | Log p (O/W) | H-bond donors | H-bond acceptors | tPSA   | Rotatable bond |
|-----------|--------------|--------|-------------|---------------|------------------|--------|----------------|
| 1         | Zinc02843810 | 437.49 | 2.6         | 1             | 4                | 87.00  | 7              |
| 2         | Zinc02691641 | 443.49 | 4.6         |               | 5                | 65.07  | 5              |
| 3         | Zinc03614688 | 368.26 | 4.08        | 1             | 3                | 47.56  | 3              |
| 4         | Zinc49543397 | 377.37 | 3.16        | 2             | 3                | 103.62 | 4              |
| 5         | Zinc02690781 | 474.48 | 3.79        | 1             | 5                | 84.94  | 8              |
| 6         | Zinc36360243 | 403.36 | 3.9         | 2             | 5                | 79.87  | 4              |
| 7         | Zinc18200970 | 490.53 | 3.4         | 2             | 5                | 116.95 | 5              |
| 8         | Zinc02690805 | 496.44 | 3.8         | 1             | 5                | 84.94  | 8              |
| 9         | Zinc02690789 | 490.48 | 3.4         | 1             | 6                | 94.17  | 9              |
| 10        | Zinc07095120 | 411.53 | 4.05        | 2             | 4                | 88.38  | 6              |
| 11        | Zinc11112053 | 439.53 | 3.7         | 1             | 5                | 80.23  | 6              |
| 12        | Zinc23483881 | 351.85 | 3.3         | 1             | 3                | 47.56  | 6              |
| 13        | Zinc09373064 | 459.53 | 3.2         | 1             | 6                | 91.16  | 5              |

**Table S3** The effect of compound **6** on the phases of the MCF7 cell cycle.

| compounds | %G0-G1 | %S    | %G2-M | %Pre G1 |
|-----------|--------|-------|-------|---------|
| Control   | 53.91  | 42.71 | 3.38  | 1.48    |
| <b>6</b>  | 36.28  | 29.66 | 34.06 | 27.36   |

**Table S4** Hydrogen bonding of compounds **6,8** and **9** docked into the colchicine binding site.

| Cp       | Interacting moiety in compound  | Amino acid involved  | Distance Å | Type of interaction |
|----------|---------------------------------|----------------------|------------|---------------------|
| <b>6</b> | OH-imidazopyridine<br>OH-phenyl | C=O Thr $\alpha$ 179 | 2.5        | H-bond              |
|          |                                 | NH Ala $\beta$ 250   | 3.1        | H-bond              |
| <b>8</b> | C=O<br>C=O                      | SH Cys $\beta$ 241   | 3.1        | H-bond              |
|          |                                 | OH Ser $\alpha$ 178  | 2.9        | H-bond              |
| <b>9</b> | OCH <sub>3</sub><br>C=O         | SH Cys $\beta$ 241   | 3.6        | H-bond              |
|          |                                 | OH Ser $\alpha$ 178  | 3.0        | H-bond              |

**Table S5** Average RMSD values (Å) of complexes of **6, 8, 9, 14, 15** and colchicine with tubulin over 1.5  $\mu$ s of simulation.

| Å                         | <b>6</b>      | <b>8</b>      | <b>9</b>      | <b>14</b>     | <b>15</b>     | colchicine    |
|---------------------------|---------------|---------------|---------------|---------------|---------------|---------------|
| Average RMSD ligand       | 1.4 $\pm$ 0.3 | 3.4 $\pm$ 0.5 | 2.2 $\pm$ 0.8 | 2.2 $\pm$ 0.8 | 1.7 $\pm$ 0.3 | 1.5 $\pm$ 0.4 |
| Average RMSD protein (AB) | 2.5 $\pm$ 0.2 | 2.5 $\pm$ 0.2 | 2.4 $\pm$ 0.2 | 2.6 $\pm$ 0.3 | 2.6 $\pm$ 0.3 | 2.5 $\pm$ 0.2 |

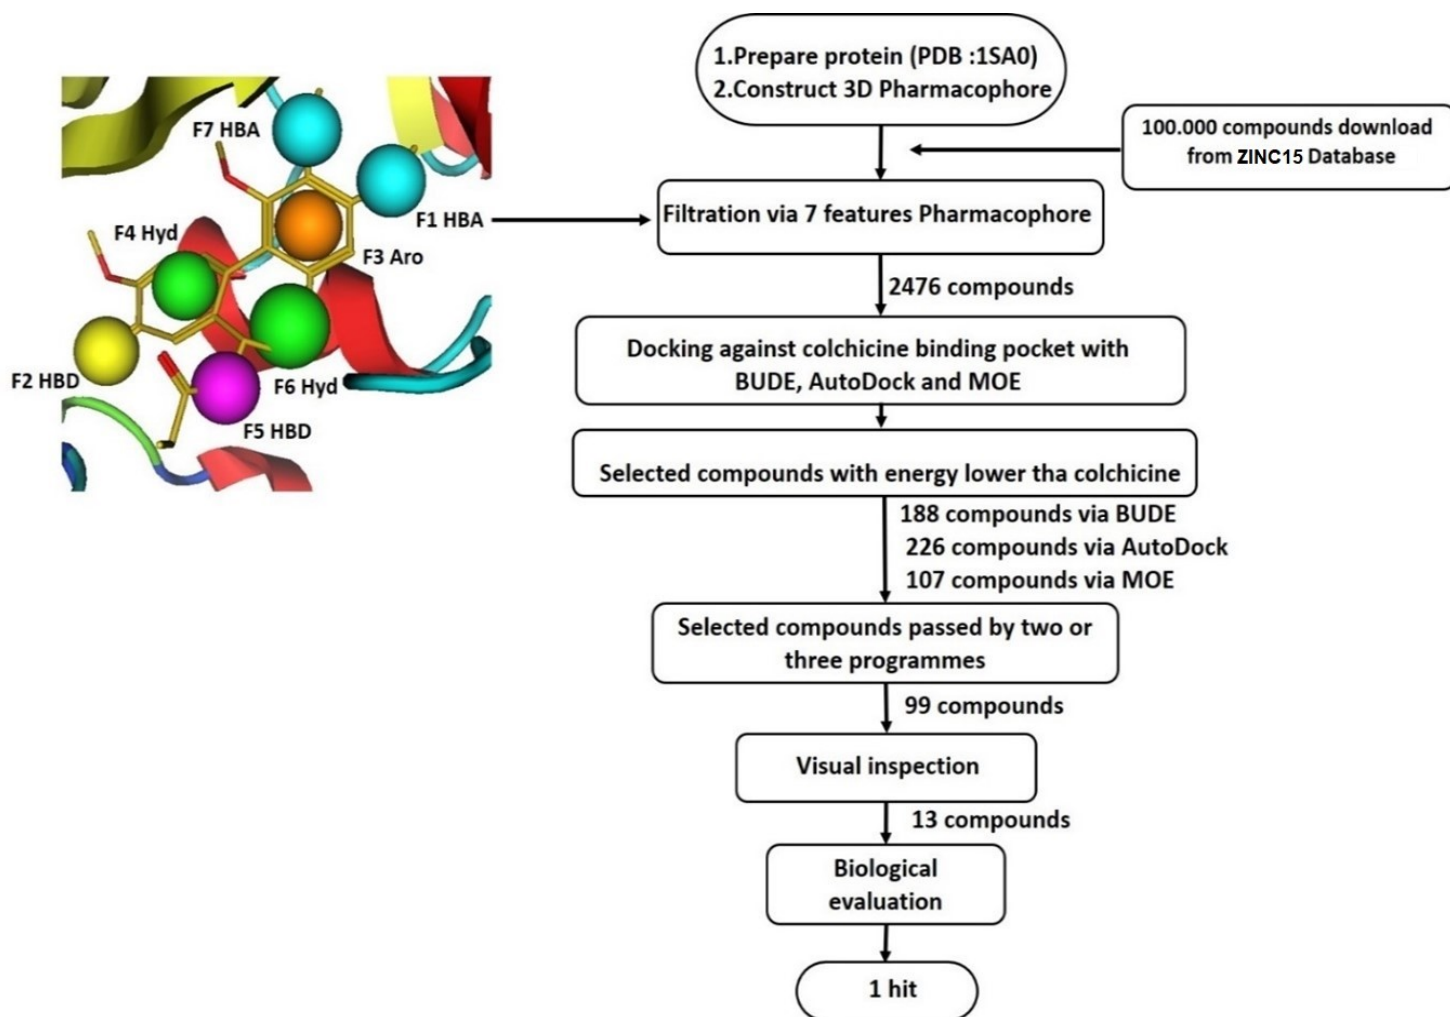

**Figure S1** Schematic view of pharmacophore structure-based virtual screening.

**A)**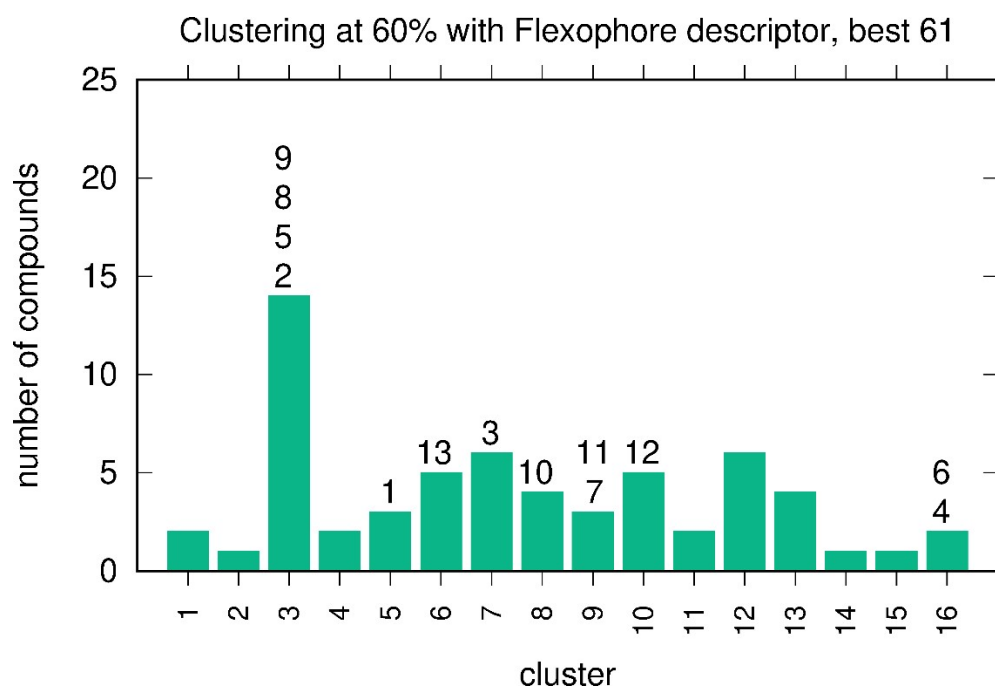**B)**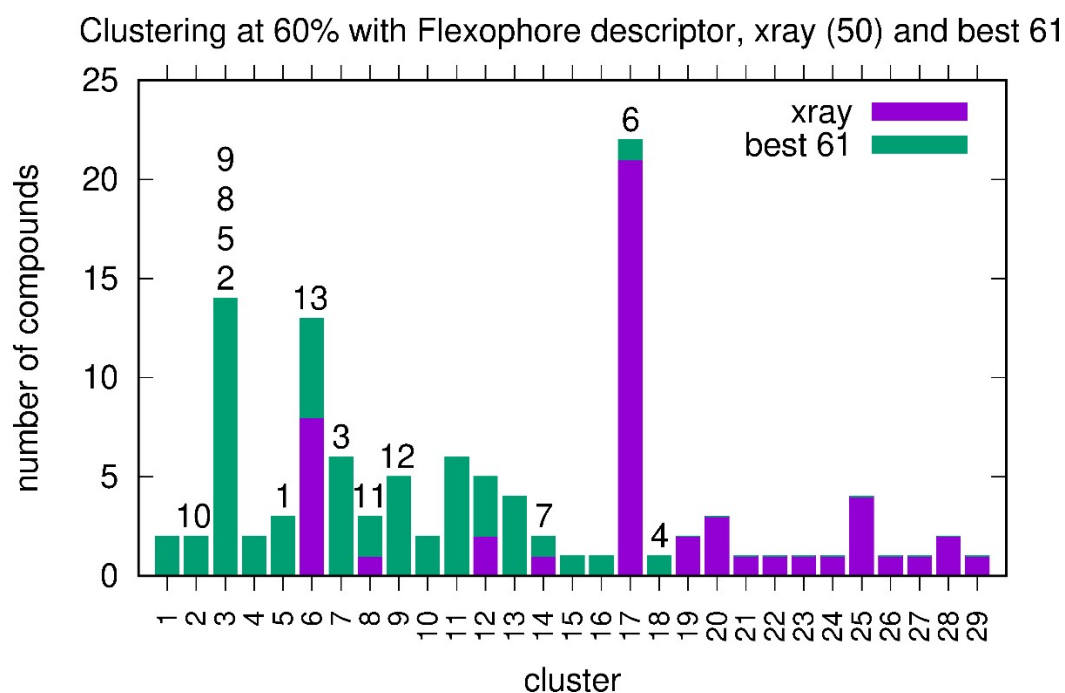

**Figure S2 A)** Clustering of the best 61 compounds with the Flexophore descriptor at 60% similarity. **B)** Clustering of the best 61 compounds with the 50 ligands in the colchicine site from crystal structures reported to date, using the Flexophore descriptor at 60% similarity. The cluster locations of **1-13** are indicated.

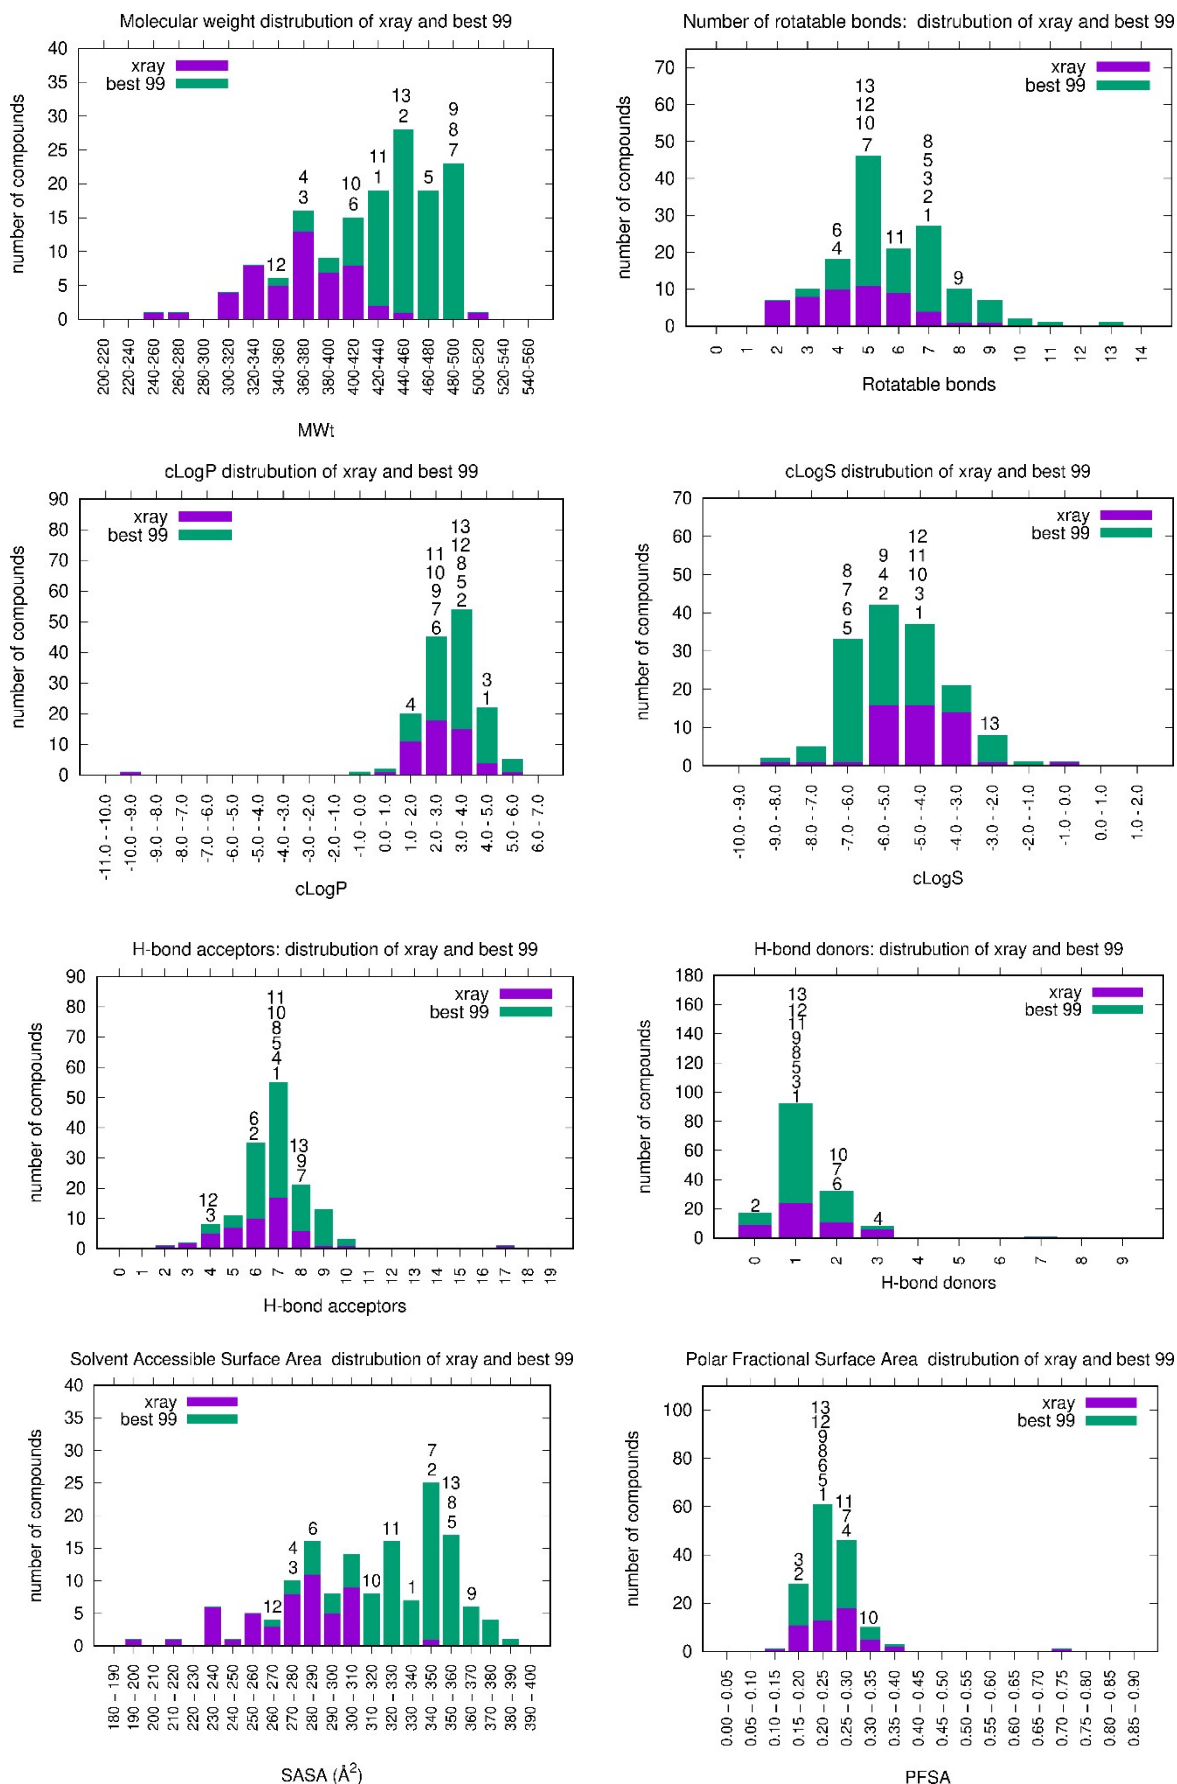

**Figure S3** Histograms of ligand properties, comparing the 99 ligands from virtual screening with the 50 ligands from known crystal structures. Locations of the shortlisted compounds are indicated by the numbers.



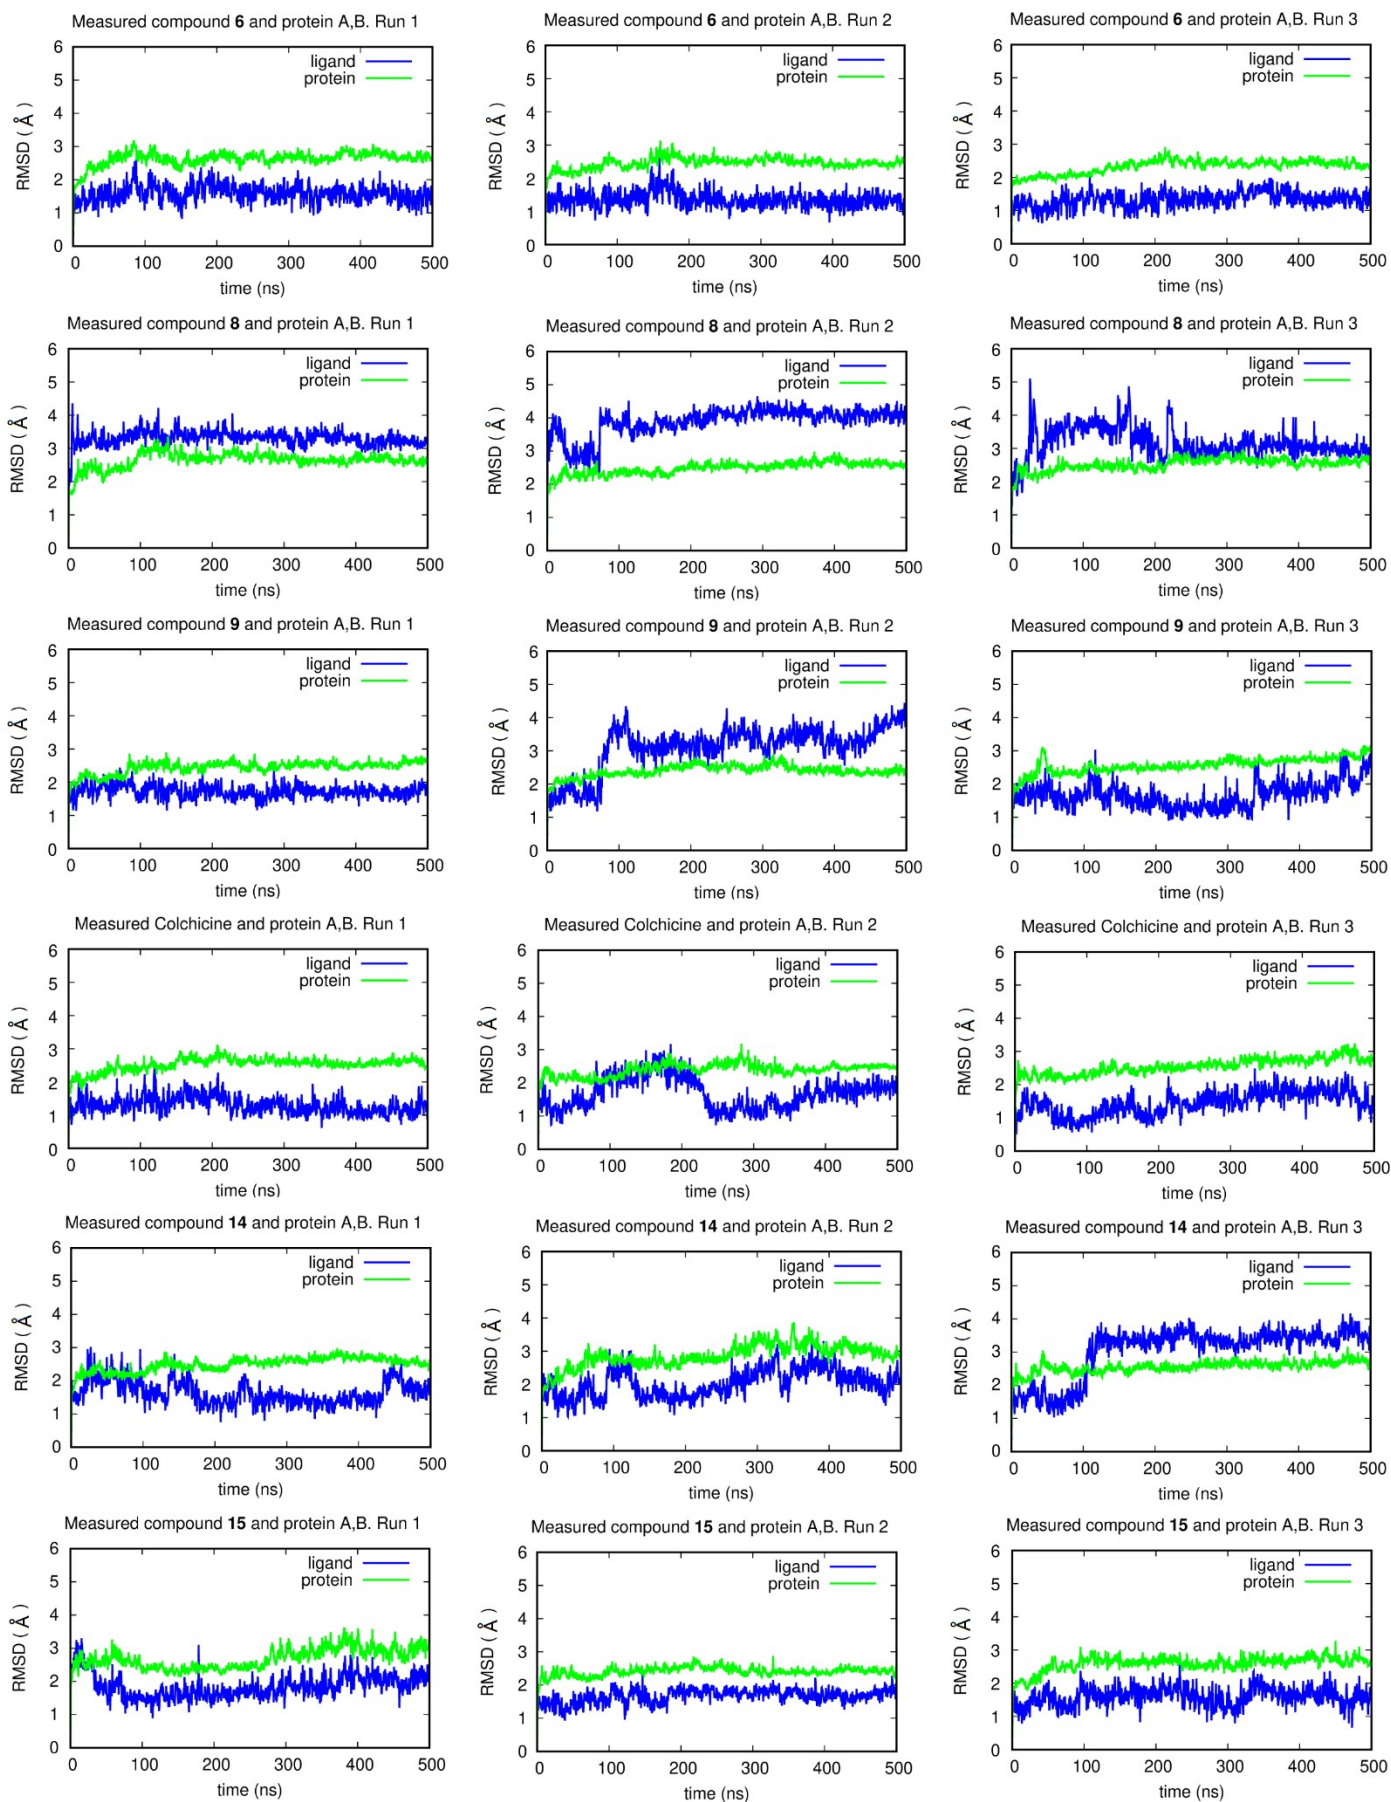

**Figure S4** RMSD plots of all protein atoms of tubulin subunits A and B ( $\alpha$  and  $\beta$ ) superimposed on the time = 0 ns structure over the trajectories and measuring

all atoms of the tubulin protein subunits A and B (green) and all atoms of the ligand (blue).

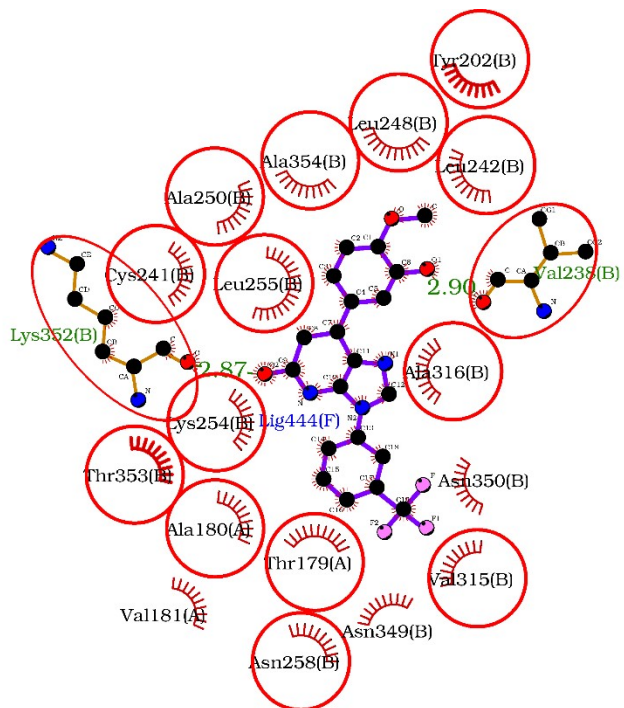

Compound 6 500 ns run 1

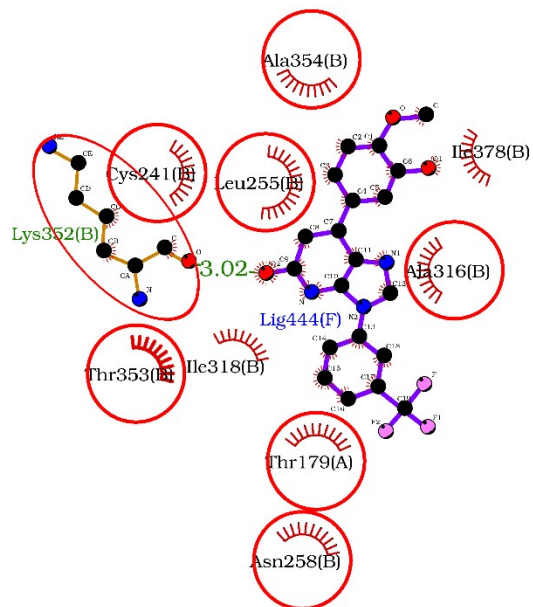

Compound 6 500 ns run 2

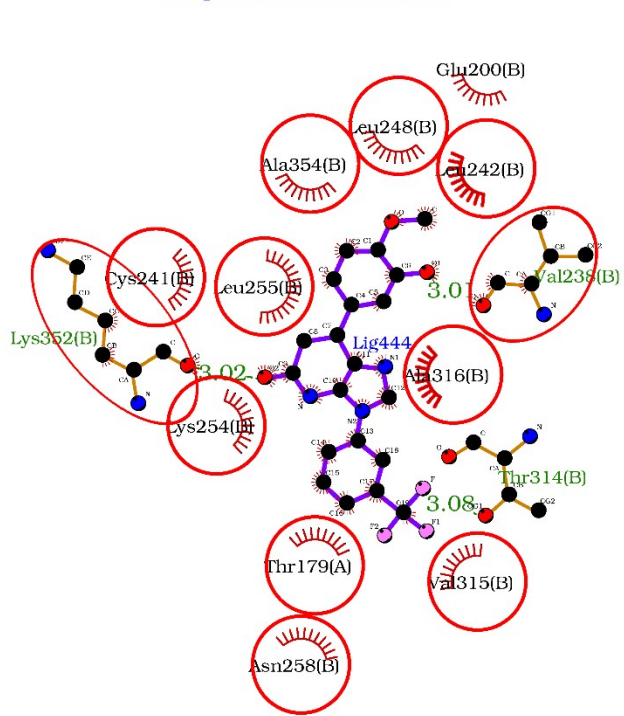

Compound 6 500 ns run 3

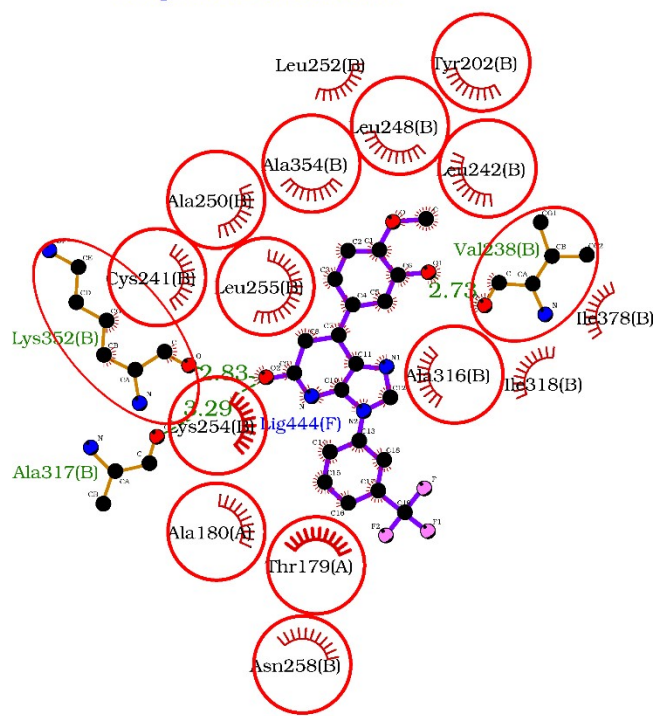

Compound 6 0 ns

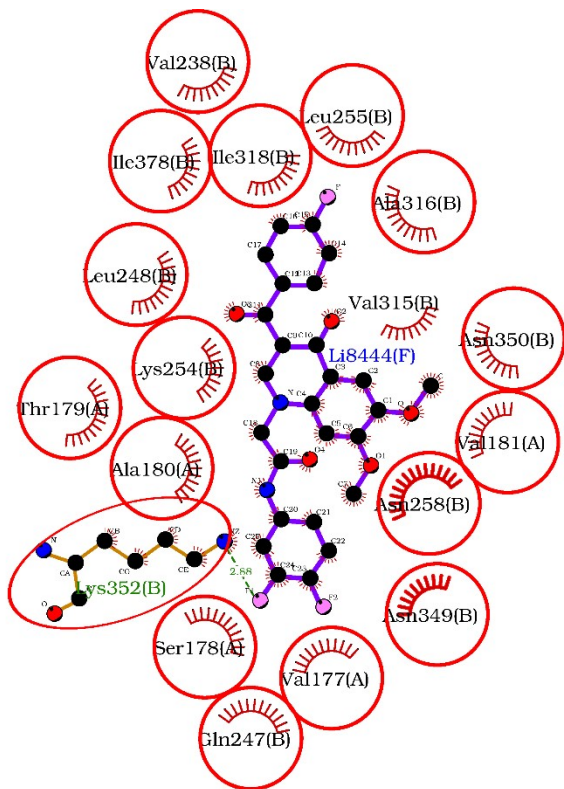

Compound 8 500 ns run 1

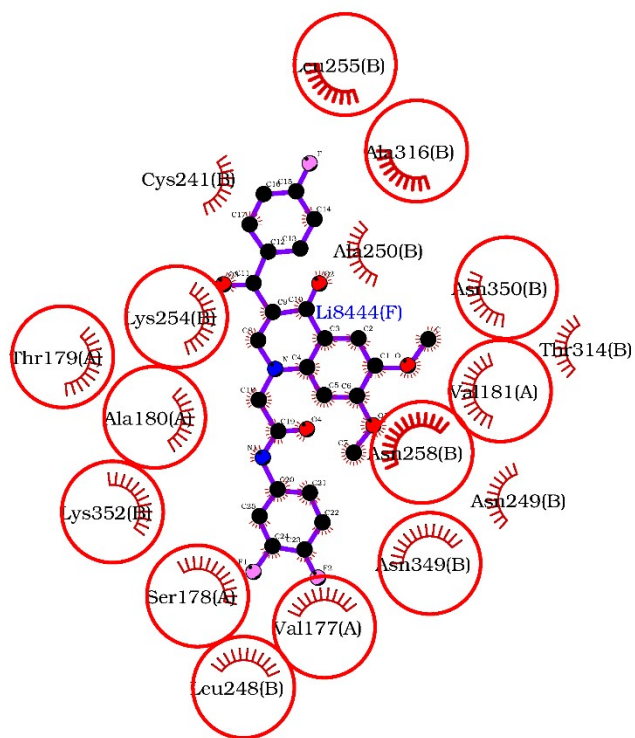

Compound 8 500 ns run 2

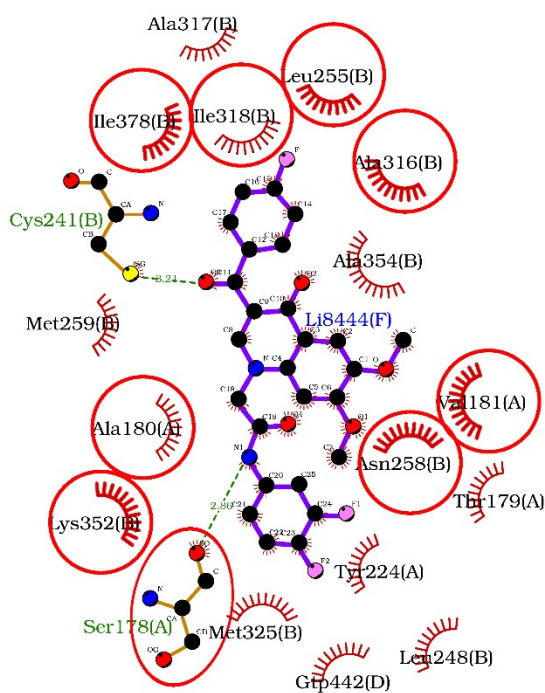

Compound 8 500 ns run 3

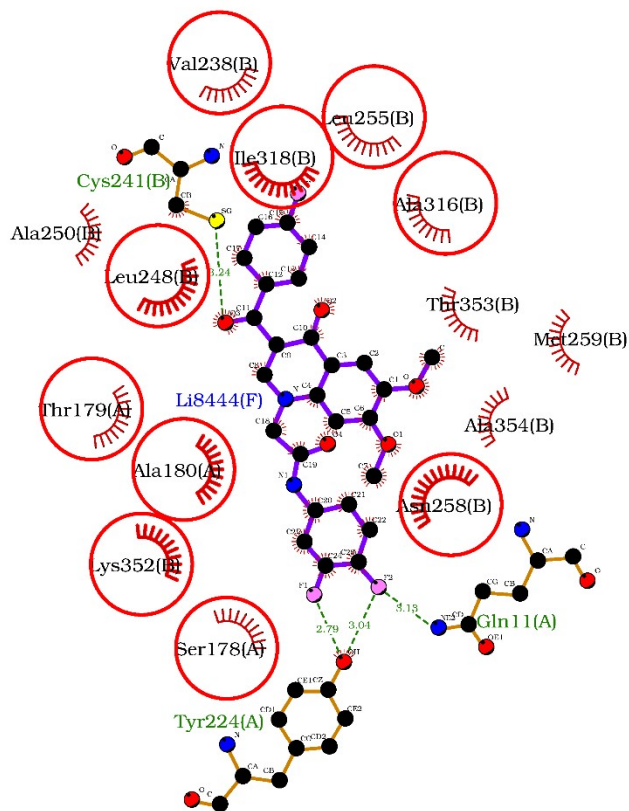

Compound 8 0 ns

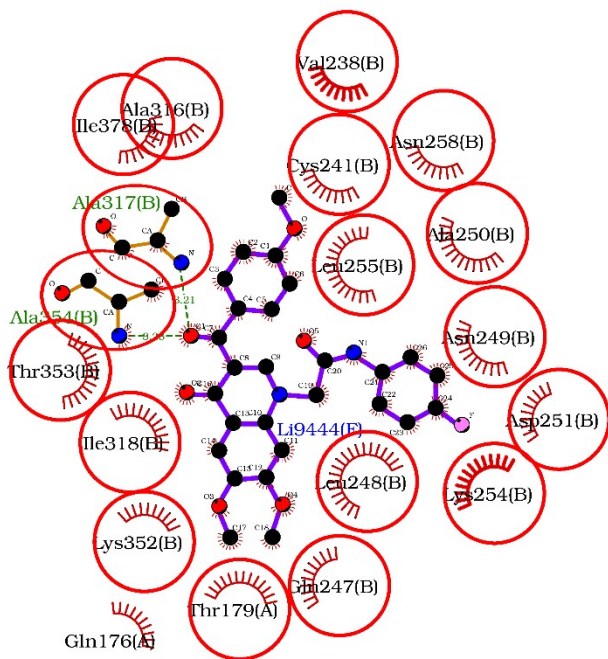

Compound 9 500 ns run 1

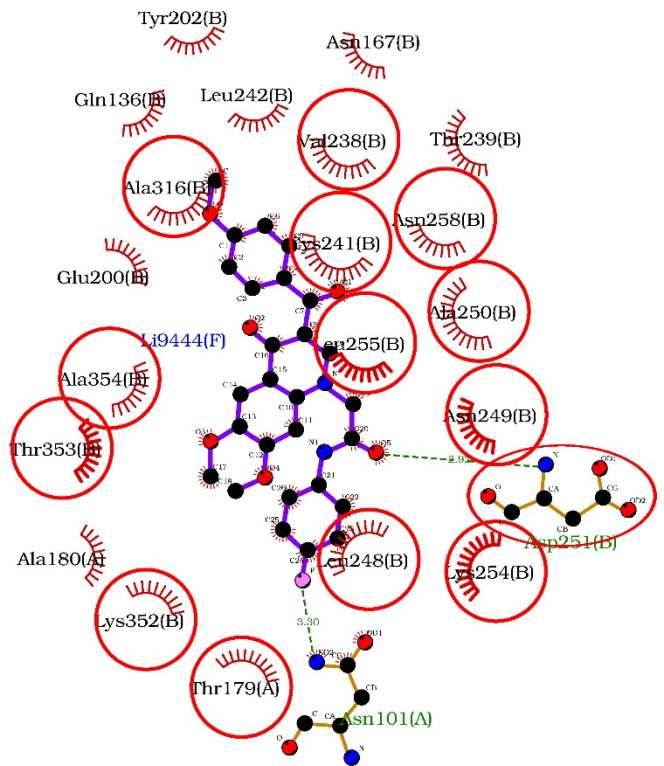

Compound 9 500 ns run 2

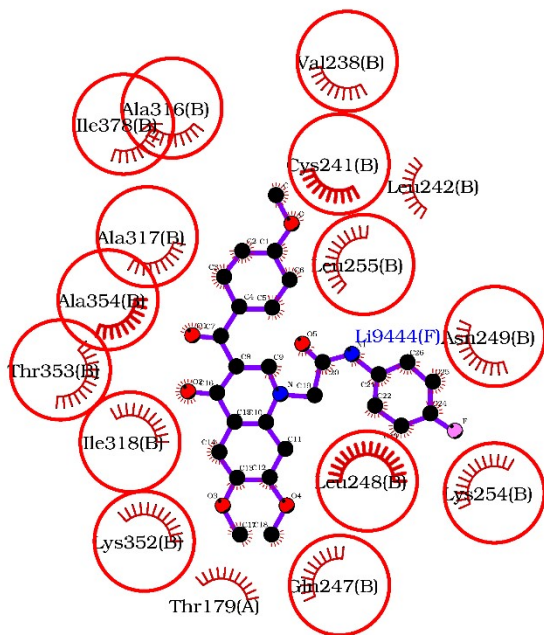

Compound 9 500 ns run 3

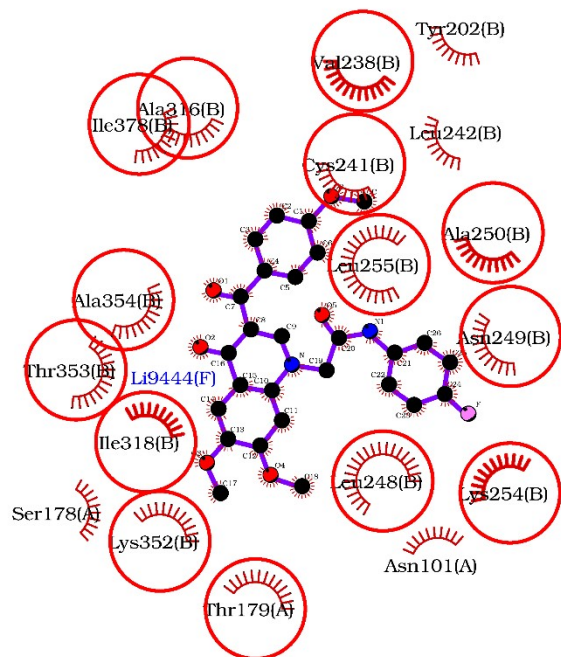

Compound 9 0 ns

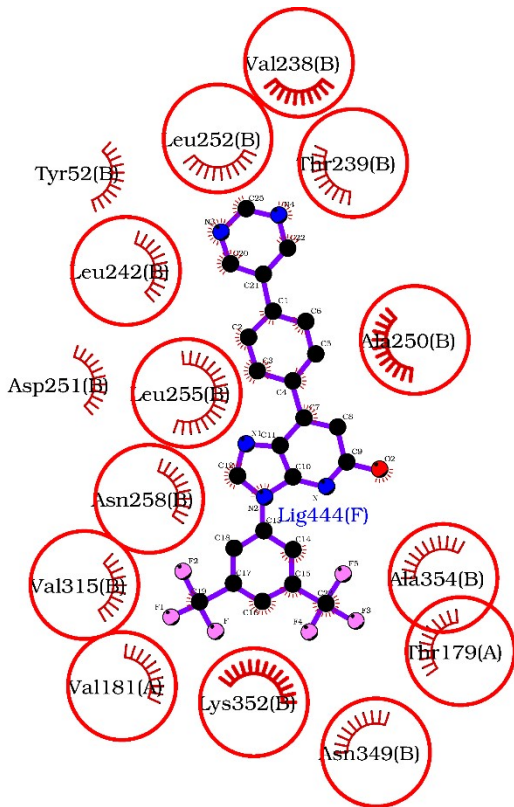

Compound 14 500 ns run 1

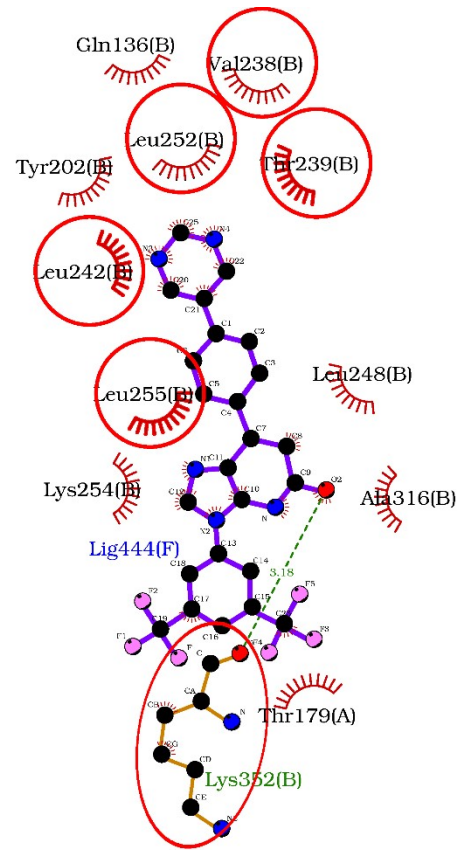

Compound 14 500 ns run 2

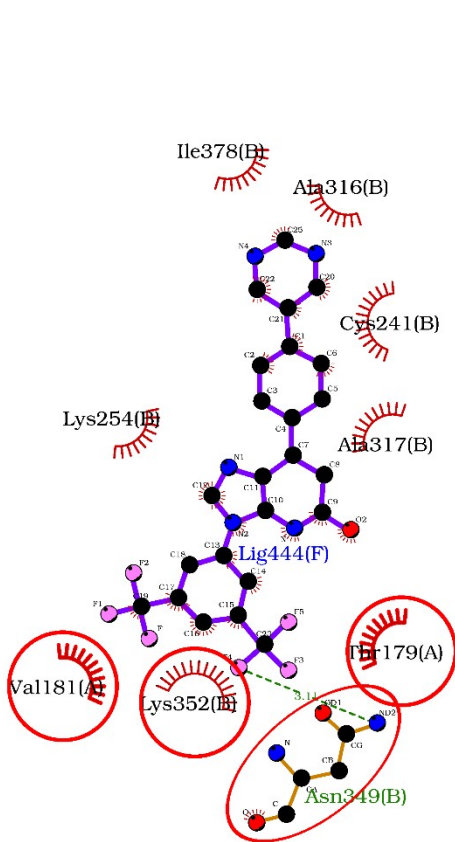

Compound 14 500 ns run 3

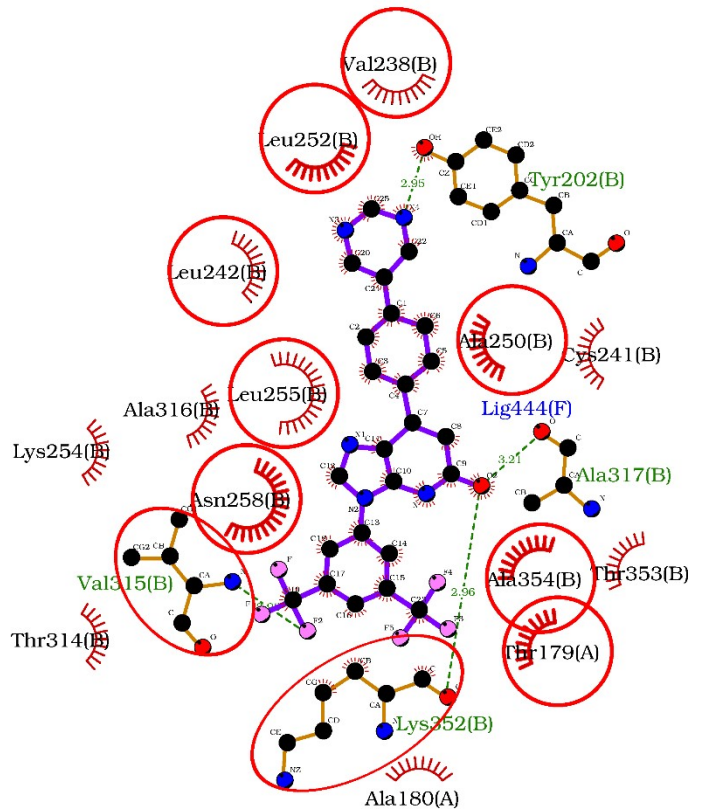

Compound 14 0 ns run 1

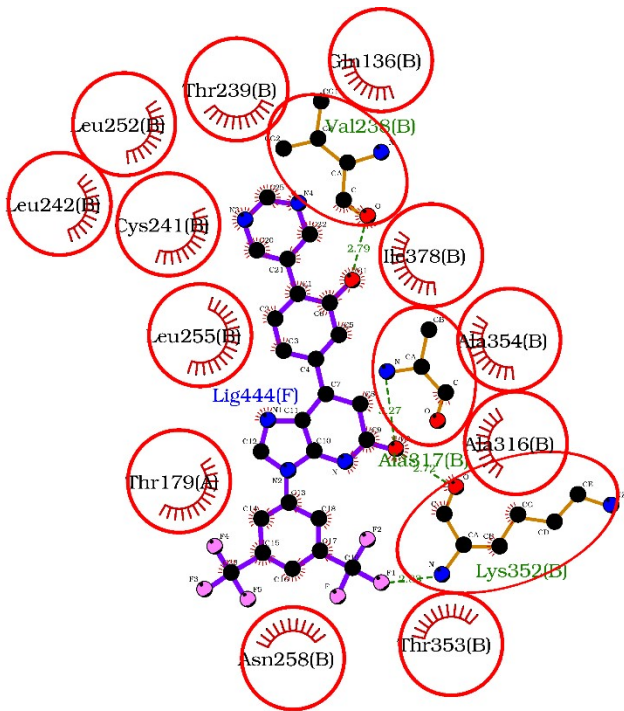

Compound 15 500 ns run 1

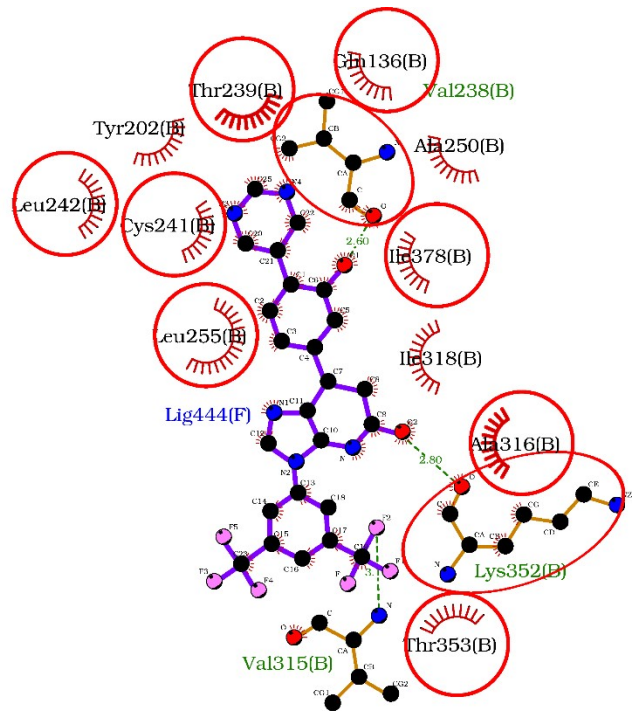

Compound 15 500 ns run 2

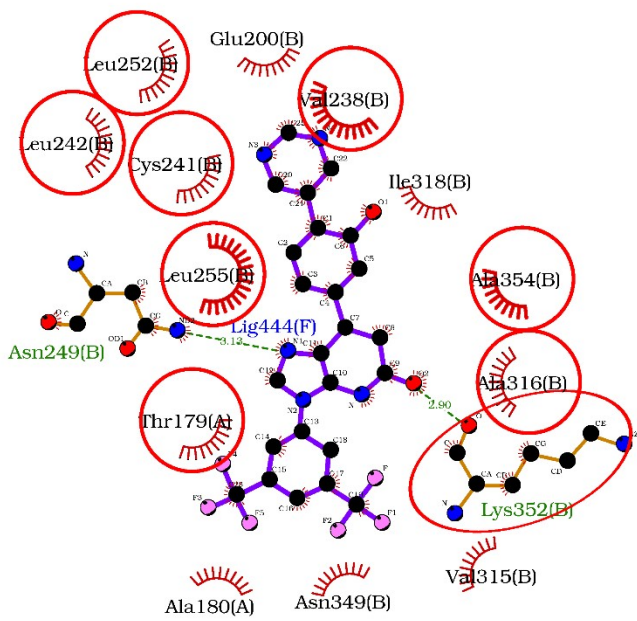

Compound 15 500 ns run 3

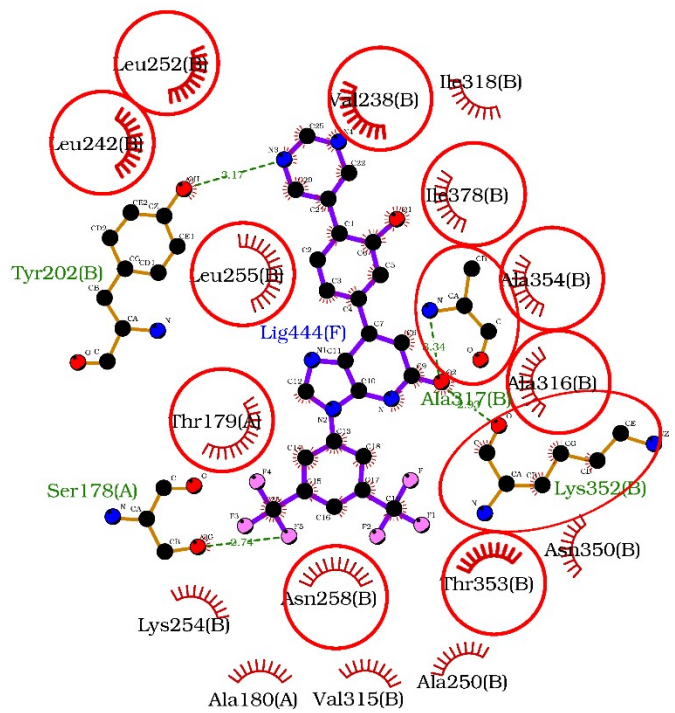

Compound 15 0 ns run 1

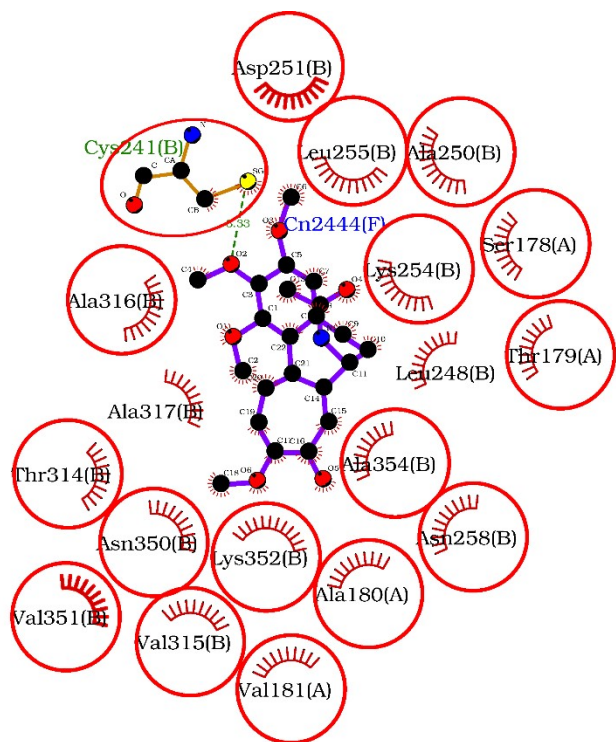

Colchicine 500 ns run 1

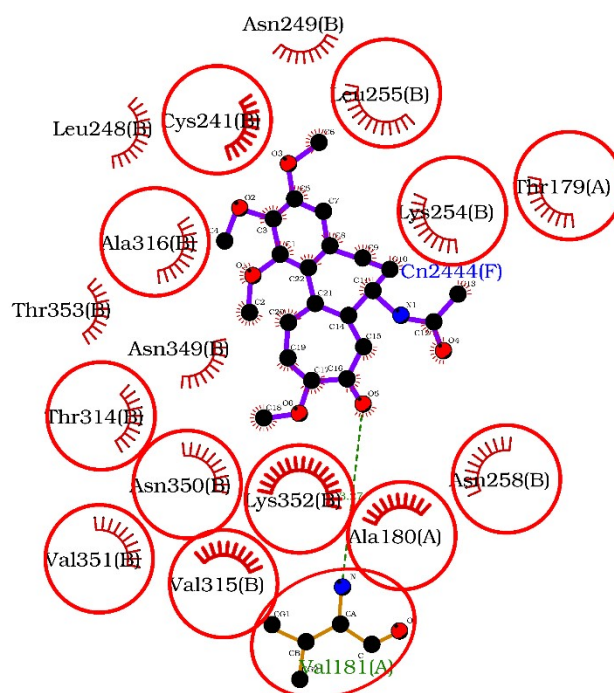

Colchicine 500 ns run 2

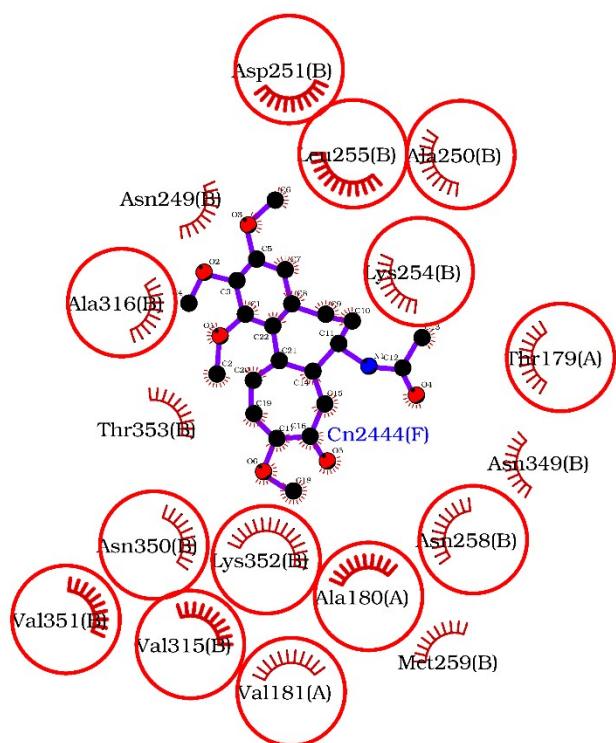

Colchicine 500 ns run 3

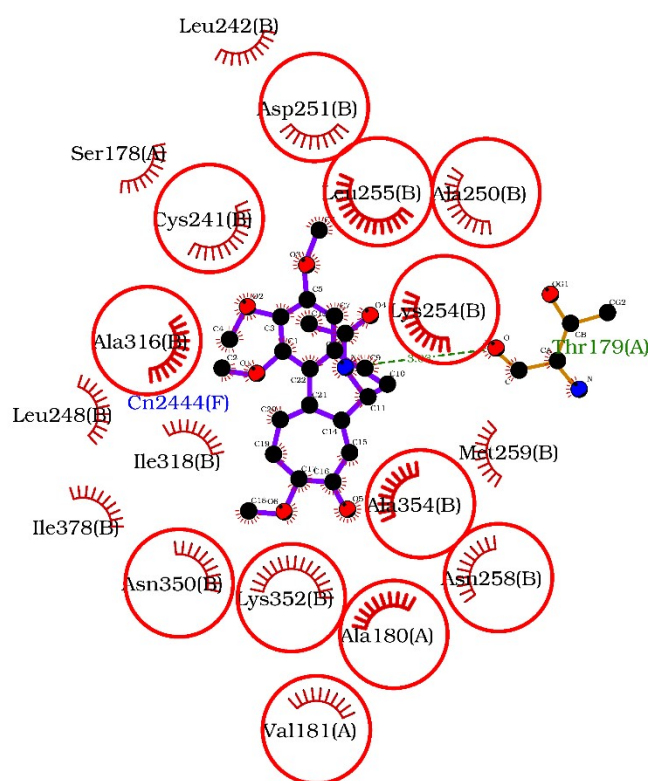

Colchicine 0 ns

**Figure S5** Ligplot<sup>+</sup> diagrams of the 500 ns structures for each simulation showing ligand-residue contacts at that moment, plus their respective starting structures.



Compound 6

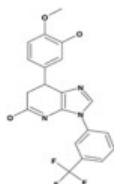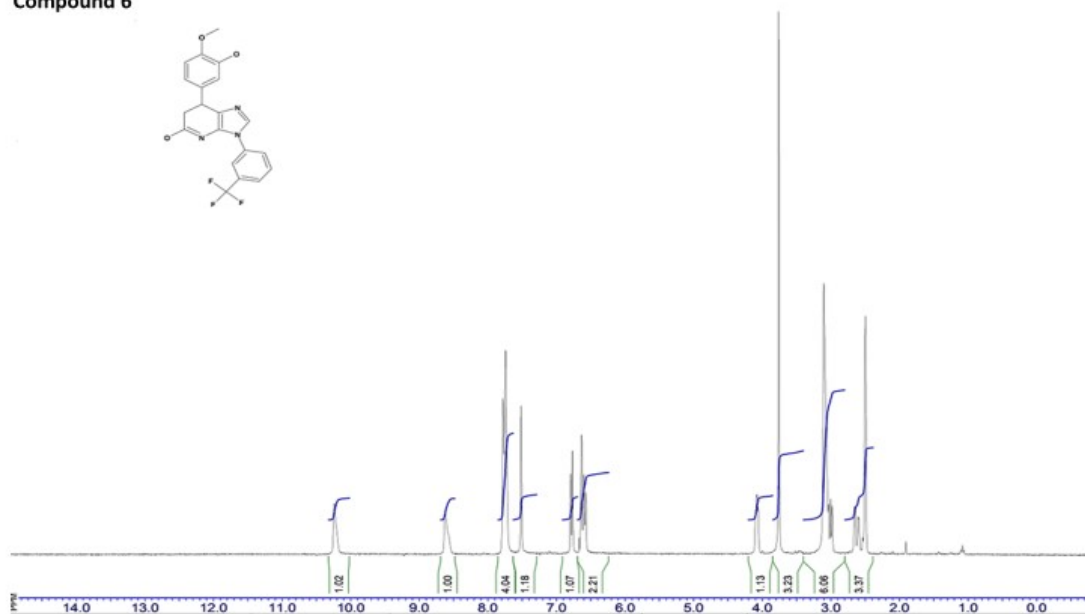

DMSO-C13/15Mar2022  
 Pulse sequence: s2pu1  
 Ambient: temperature  
 Mercury-300BB "NMR 300"  
 Pulse 45.0 degrees  
 OBSERVE C13, 75.4623880 MHz  
 DECOUPLE H1, 300.6702830 MHz  
 Power 34 dB  
 Continuously on WALTZ-16 modulated,  
 Line broadening 1.0 Hz, FT size 65536  
 Total time 32 hr, 8 min, 22 sec

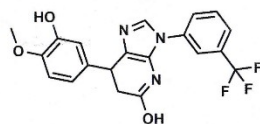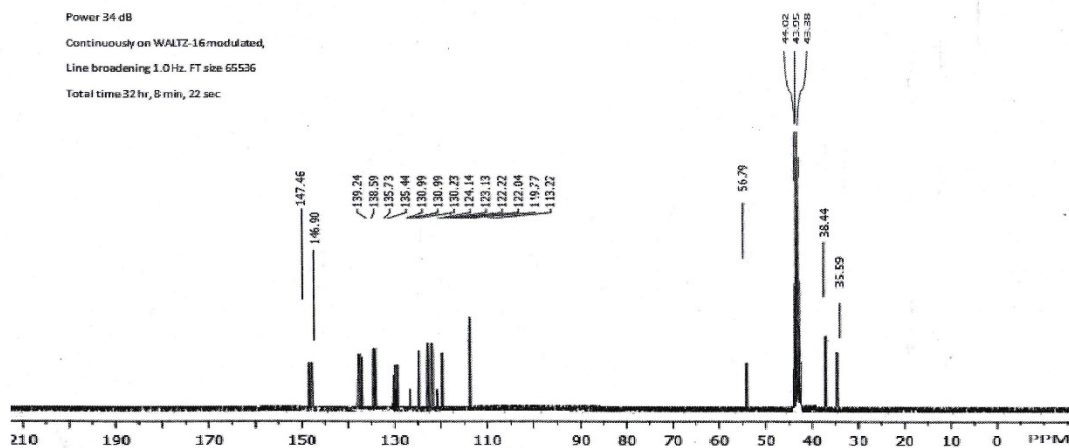

Figure S6 <sup>1</sup>H and <sup>13</sup>C NMR spectra of compound 6.

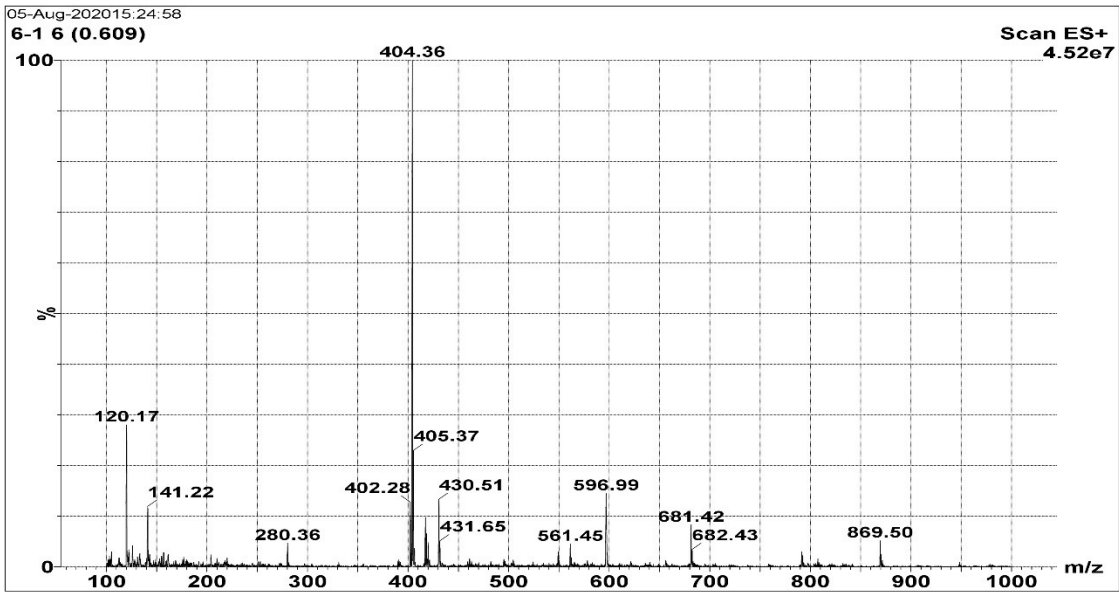

**Figure S7** Mass spectrum of compound 6.

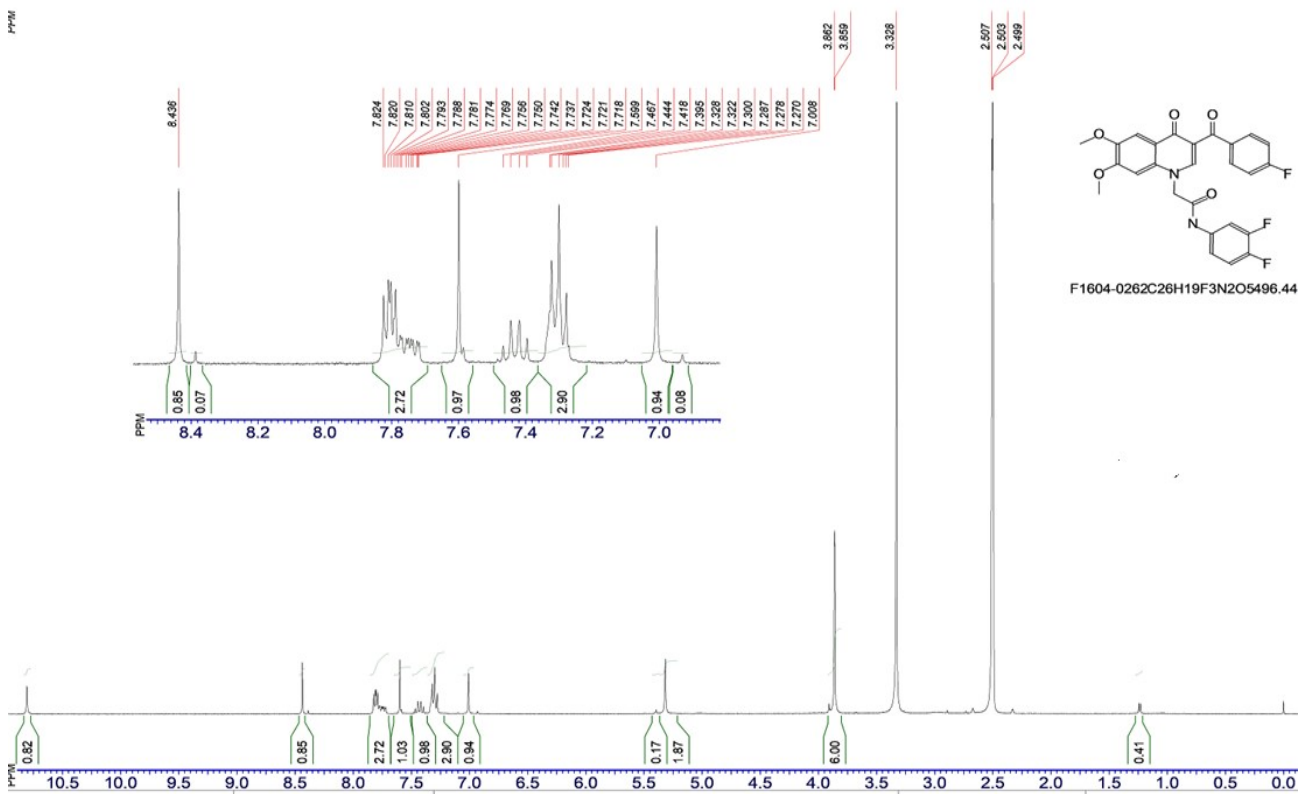

DMSO-C13/16Mar2022  
Pulse sequence: s2pu1  
Ambient: temperature  
Mercury-300BB "NMR 300"  
Pulse 45.0 degrees  
OBSERVE C13, 75.4523880 MHz  
DECOUPLE H1, 300.0702830 MHz  
Power 34 dB  
Continuously on WALTZ-16 modulated,  
Line broadening 1.0 Hz, FT sbs 65536  
Total time 34 hr, 25 min, 33 sec

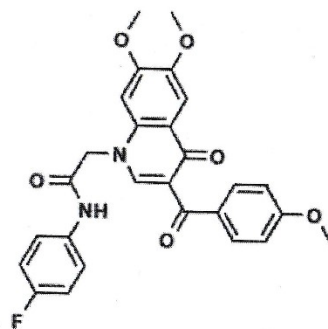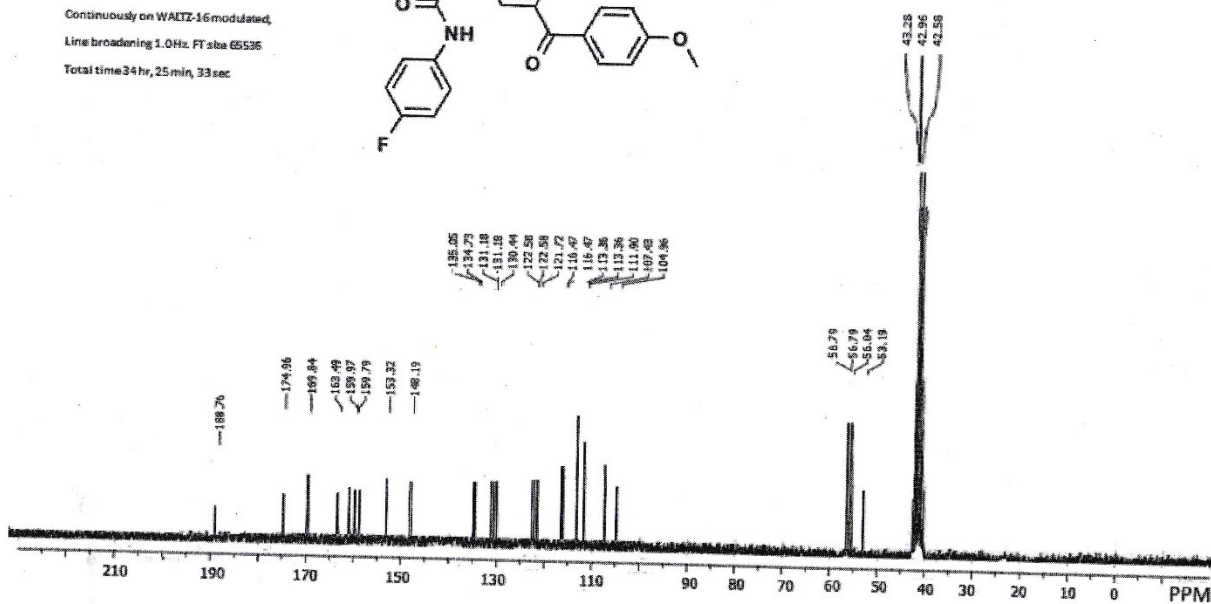

Figure S8 <sup>1</sup>H and <sup>13</sup>C NMR spectrum of compound 8

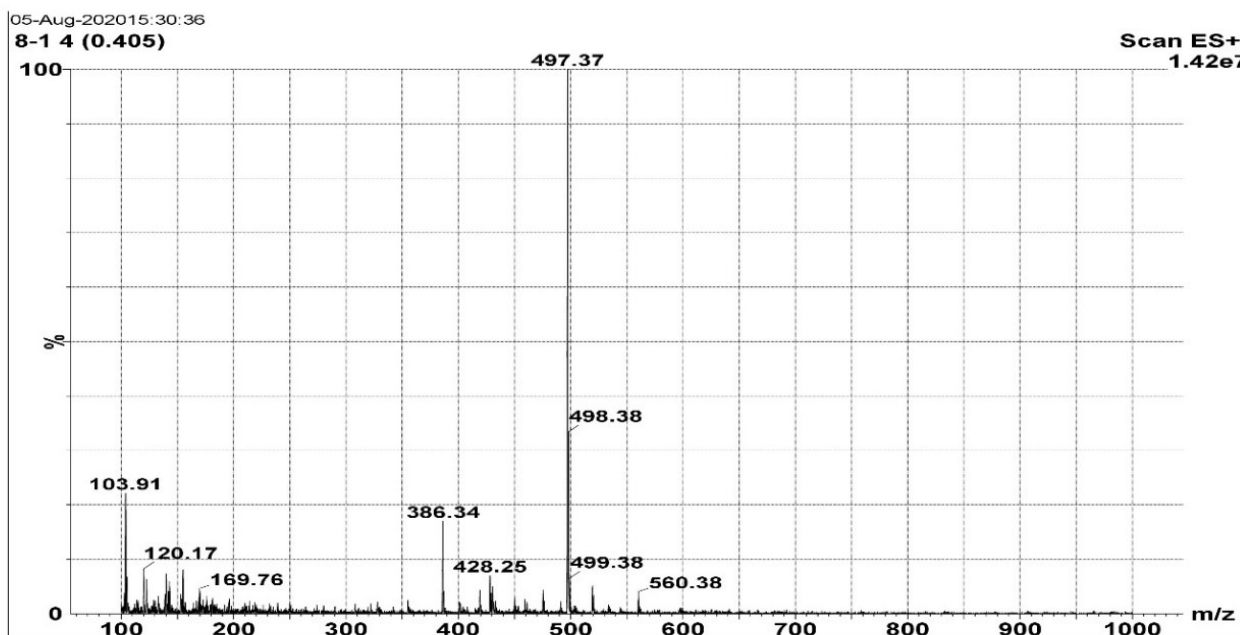

Figure S9 Mass spectrum of compound 8.

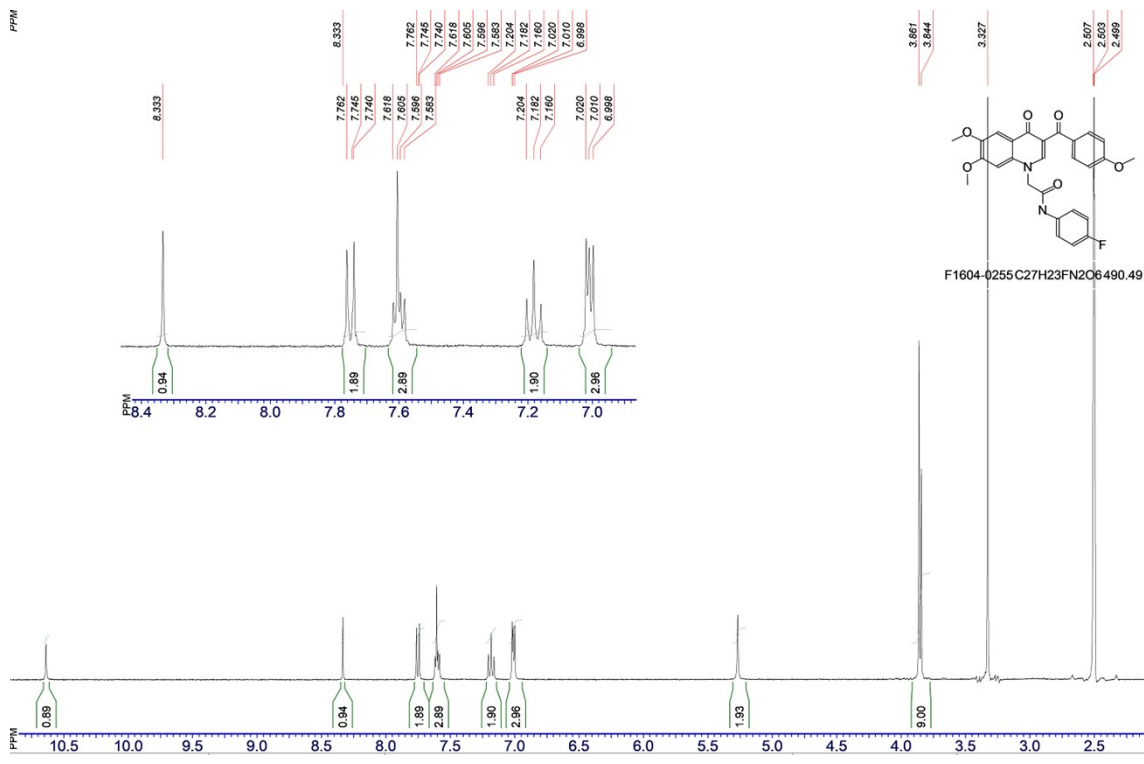

DMSO-C13/14Mar2022

Pulse sequence: s2pu1

Ambient: temperature

Mercury-300BB "NMR 300"

Pulse 45.0degrees

OBSERVE C13, 75.4523880 MHZ

DECOUPLE H1, 300.0702830 MHZ

Power 34 dB

Continuously on WALTZ-16 modulated,

Line broadening 1.0Hz. FT size 65536

Total time 35 hr, 20 min, 22 sec

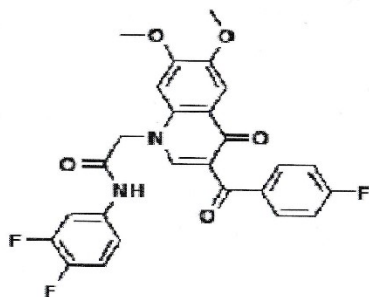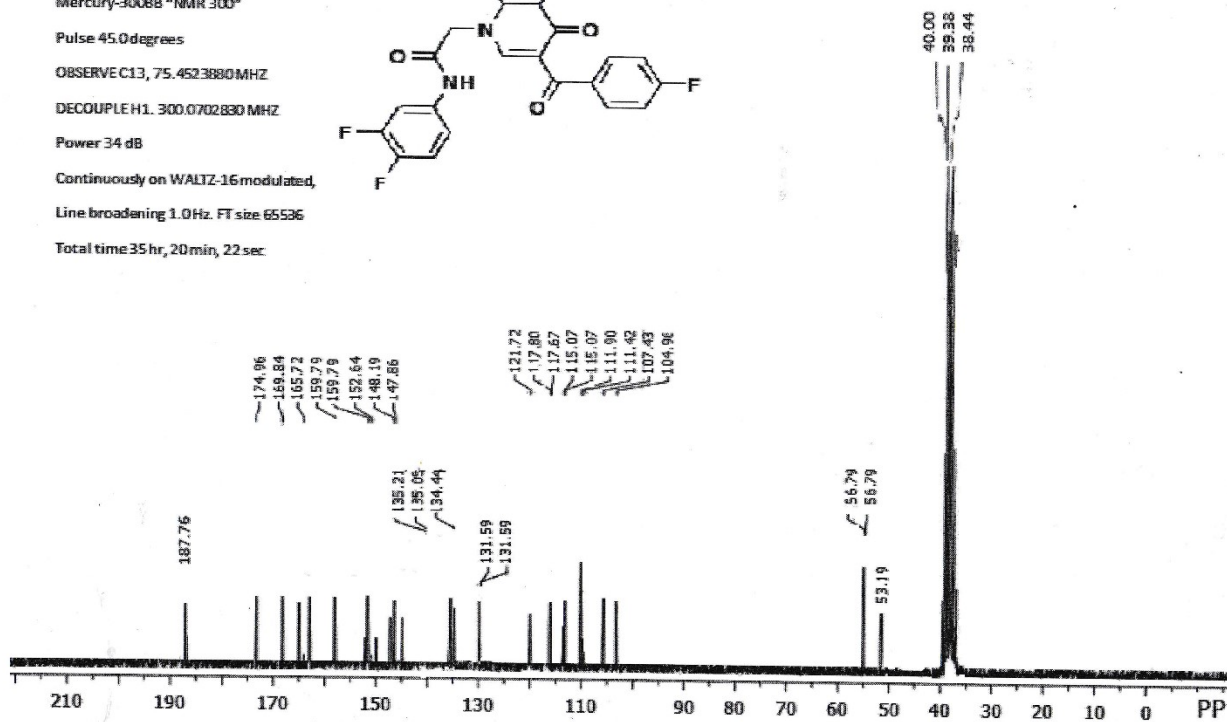

Figure S10  $^1\text{H}$  and  $^{13}\text{C}$  NMR spectrum of compound 9

# T5382903

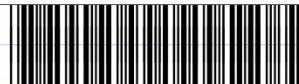

MaxPeak: 100.00%  
Ret\_Time: 1.364 min

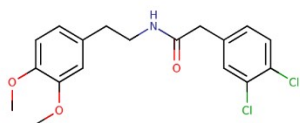

**Mol Wt** 368.25  
**Exact Mass** 367.1

| # | Time  | Area%  |
|---|-------|--------|
| 1 | 1.364 | 100.00 |

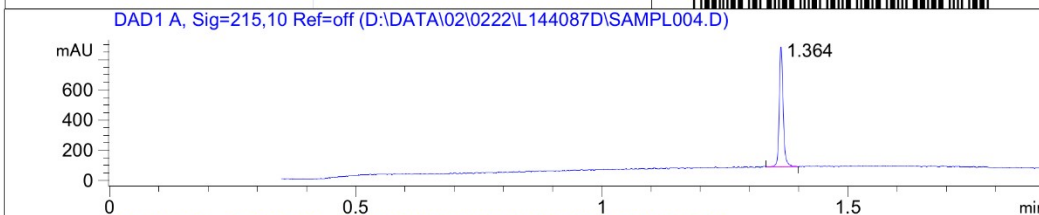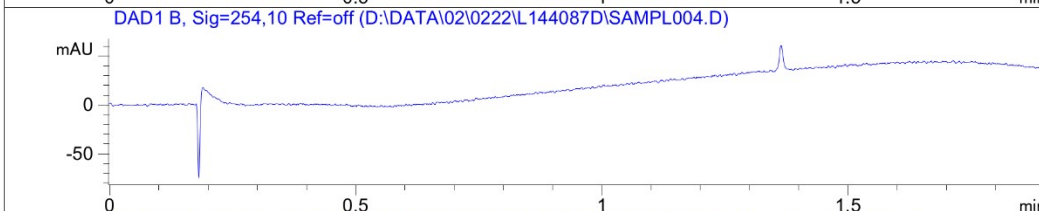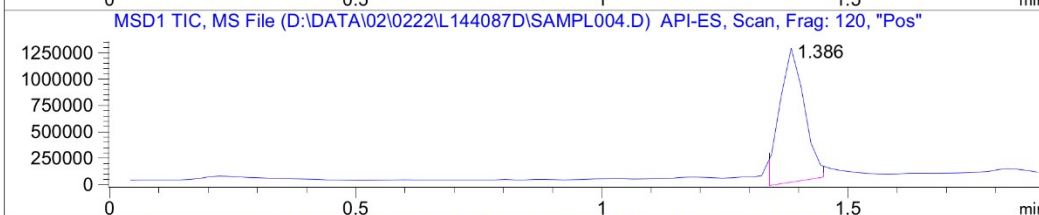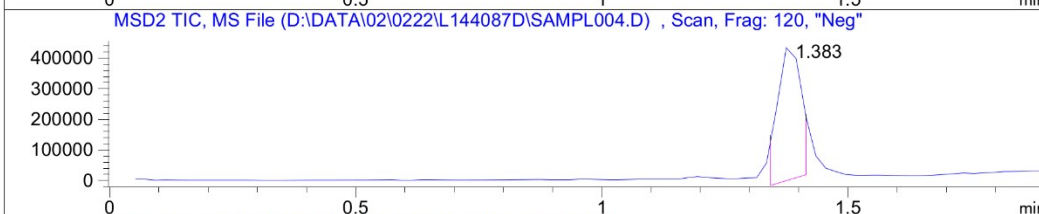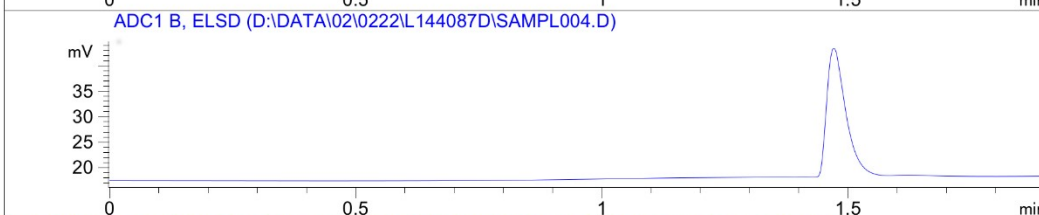

RT 1.386

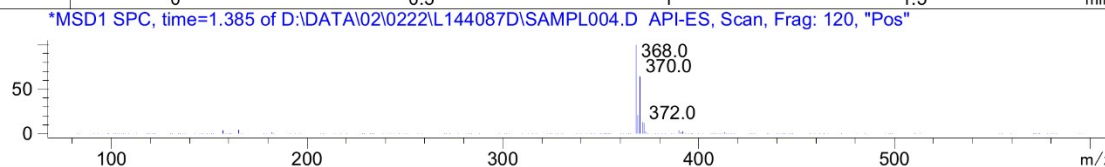

RT 1.383

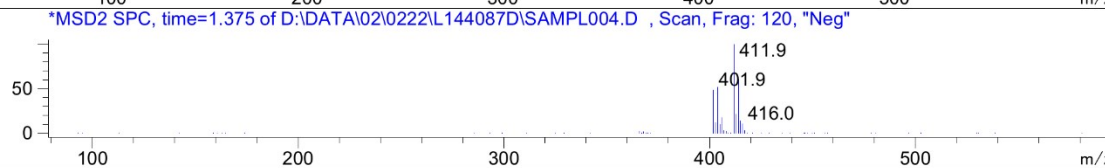

# T5105911

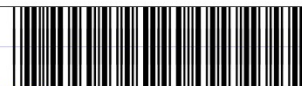

MaxPeak: 100.00%  
Ret\_Time: 1.314 min

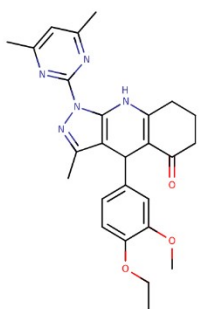

**Mol Wt** 459.54  
**Exact Mass** 459.26

| # | Time  | Area%  |
|---|-------|--------|
| 1 | 1.314 | 100.00 |

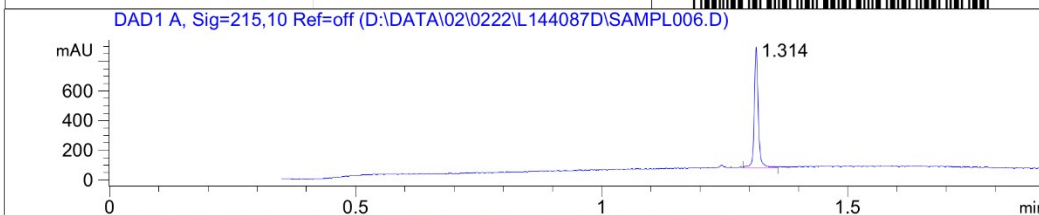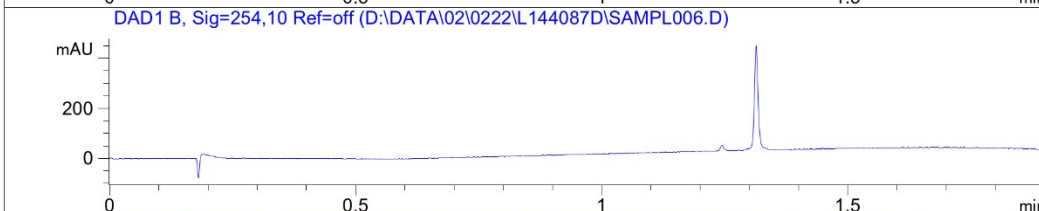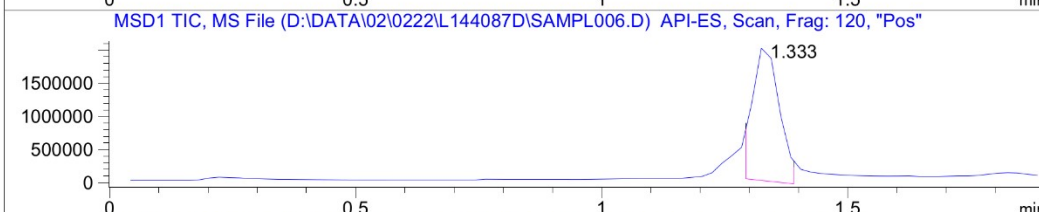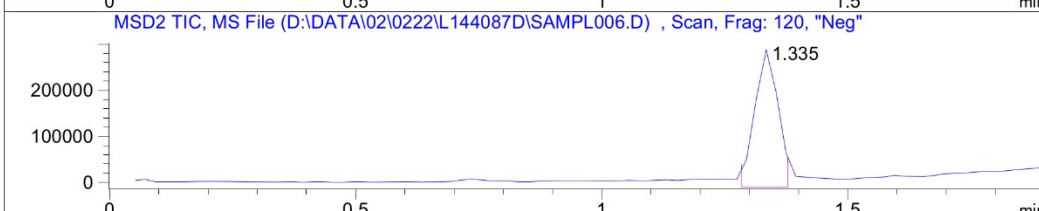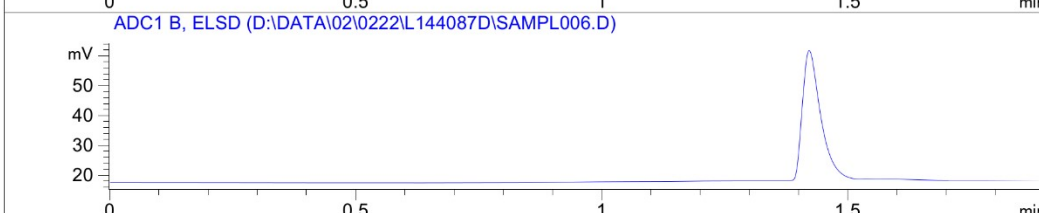

RT 1.333

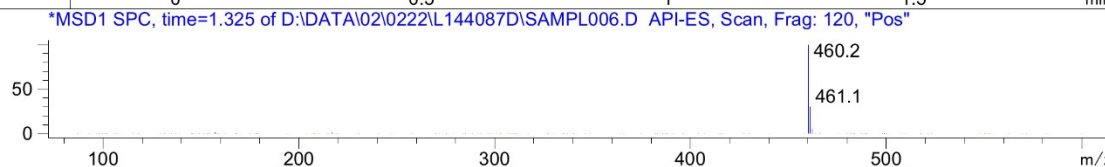

RT 1.335

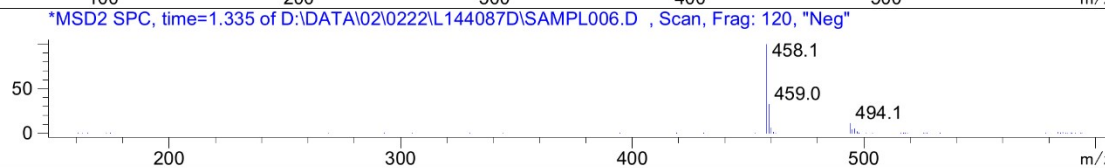

MaxPeak: 100.00%  
Ret\_Time: 1.183 min

2553300

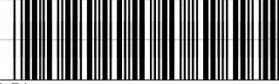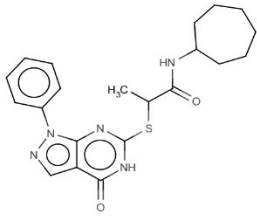

Mol Wt 411.522  
Exact Mass 411.2

| # | Time  | Area%  |
|---|-------|--------|
| 1 | 1.183 | 100.00 |

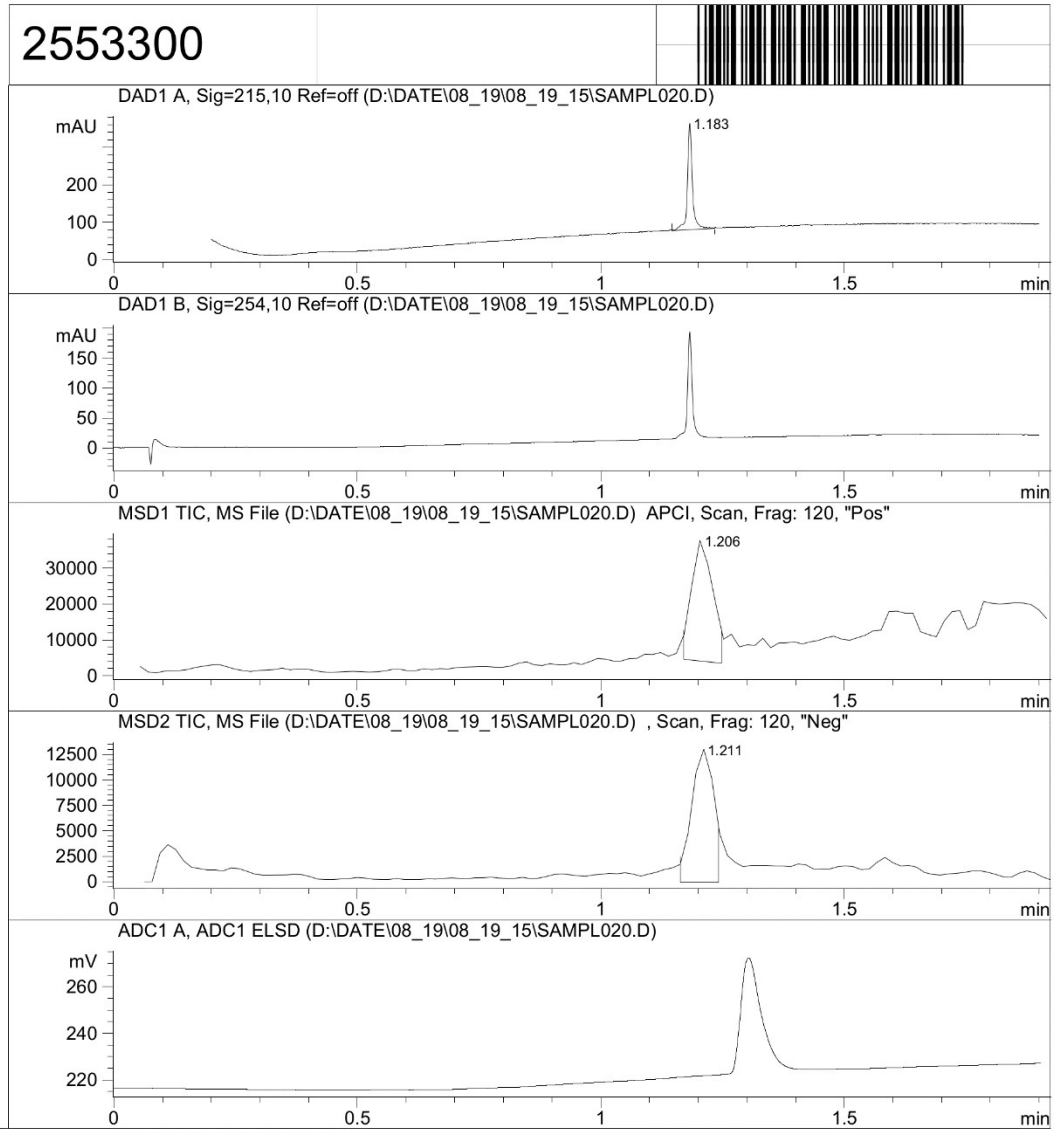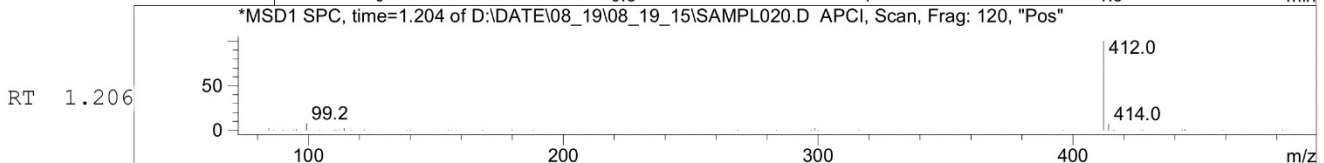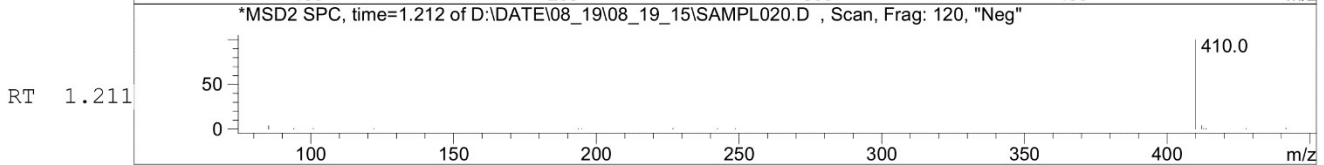

MaxPeak: 82.46%  
Ret\_Time: 1.386 min

# T6311120

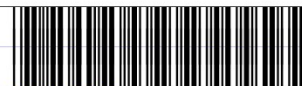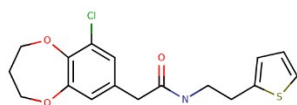

**Mol Wt** 351.85  
**Exact Mass** 351.09

| #  | Time  | Area% |
|----|-------|-------|
| 1  | 1.128 | 0.41  |
| 2  | 1.251 | 0.95  |
| 3  | 1.366 | 3.41  |
| 4  | 1.386 | 82.46 |
| 5  | 1.420 | 3.06  |
| 6  | 1.462 | 1.86  |
| 7  | 1.525 | 1.11  |
| 8  | 1.633 | 5.79  |
| 9  | 1.707 | 0.55  |
| 10 | 1.782 | 0.42  |

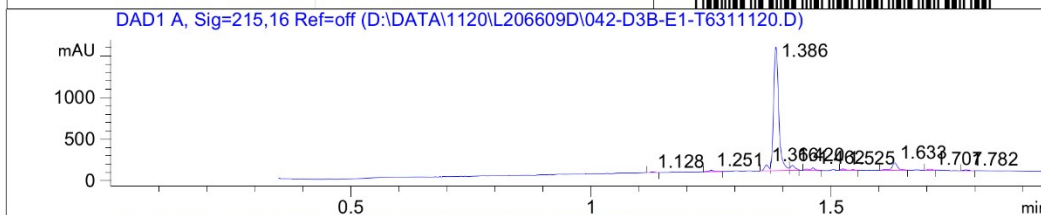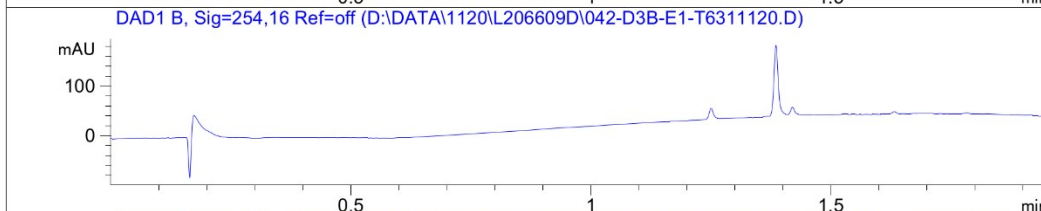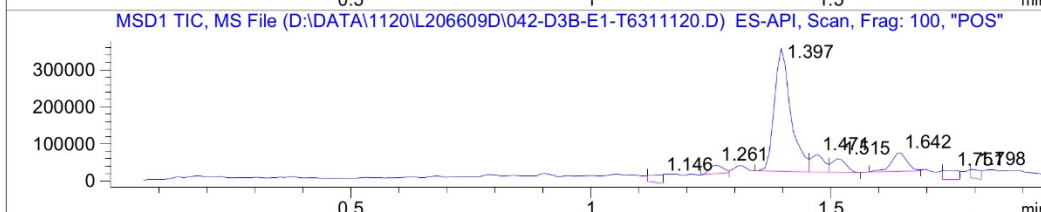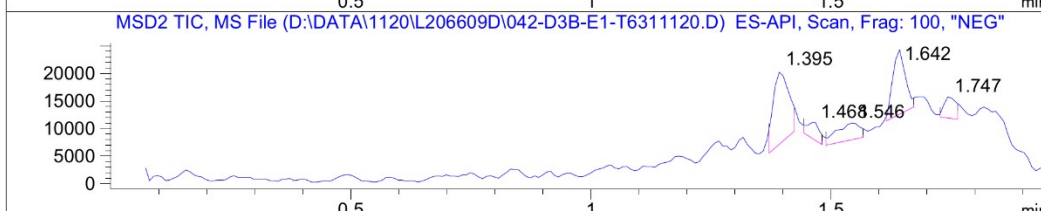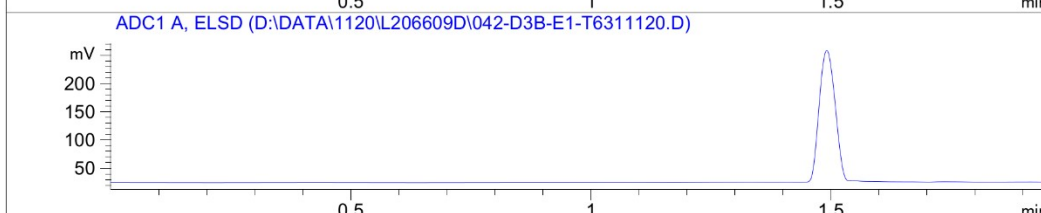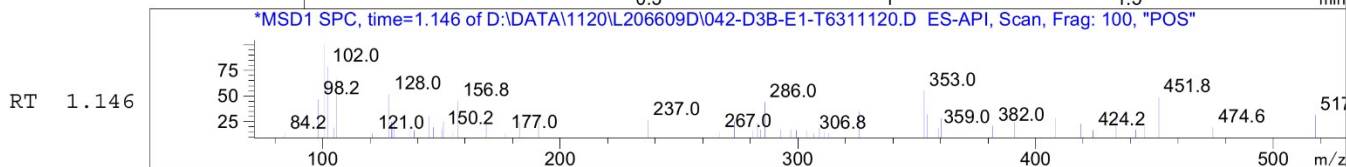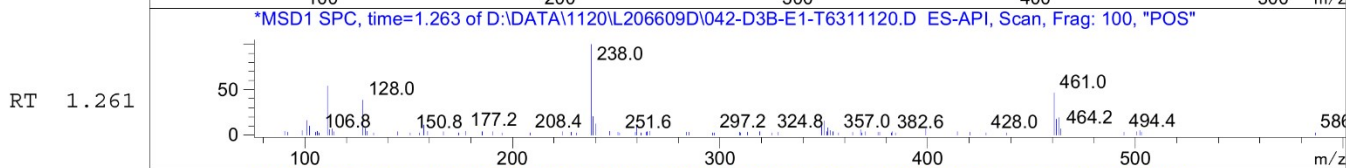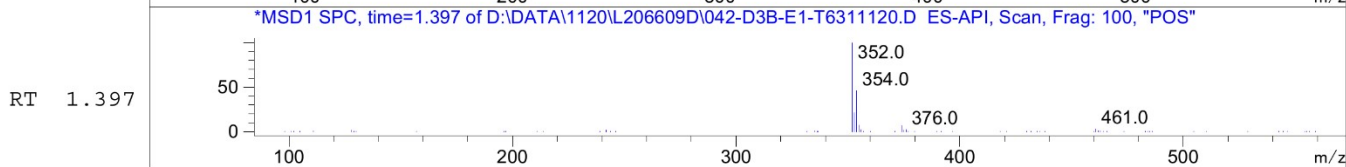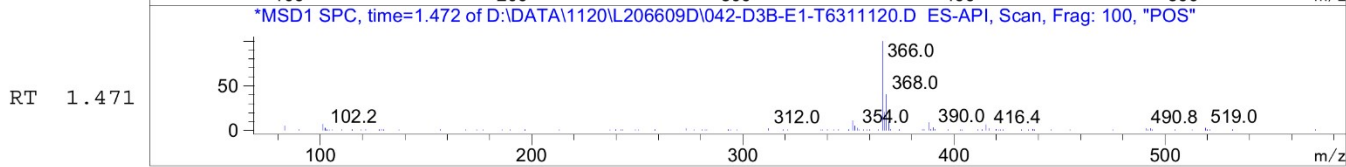



MaxPeak: 91.46%  
Ret\_Time: 1.176 min

2428744

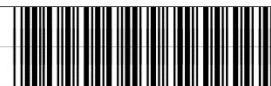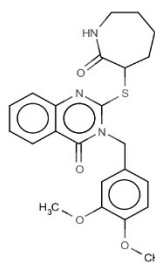

Mol Wt 439.527  
Exact Mass 439.18

| # | Time  | Area% |
|---|-------|-------|
| 1 | 1.078 | 8.54  |
| 2 | 1.176 | 91.46 |

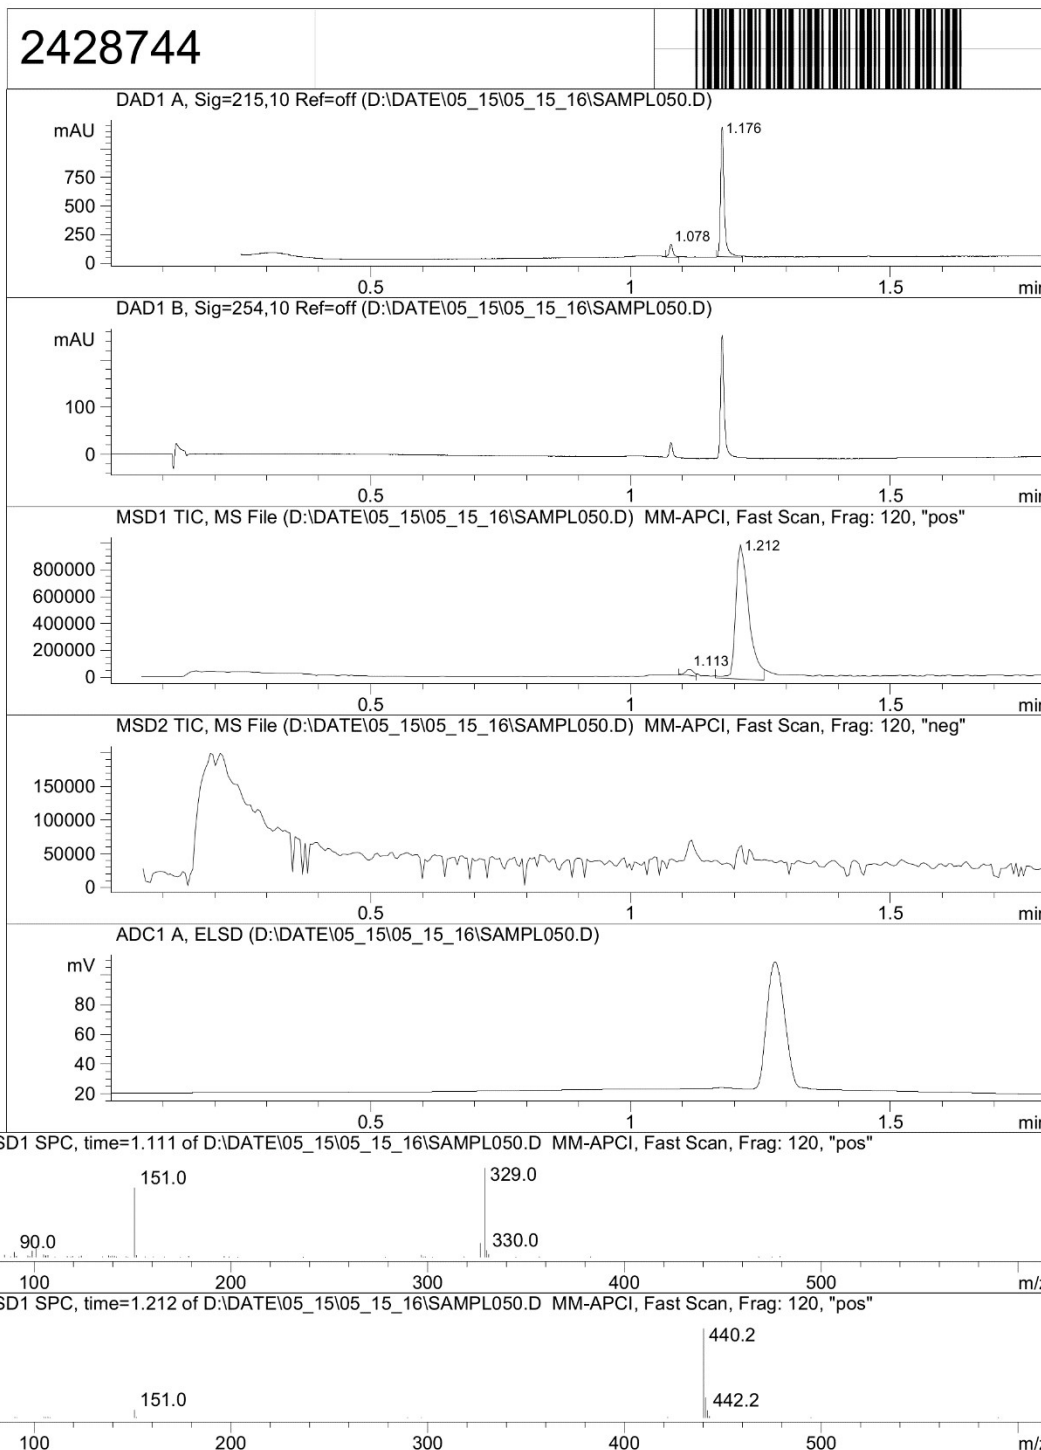

Inj.Date 5/16/2009

O

P2-F-05 RR

Acq. Method C:\CHEM32\ -> ->

Figure S11 Spectra and analytical date of the short-listed compounds
